# Supplementary material for: Extensive Metabolite Profiling in the Unexploited Organs of Black Tiger for Their Potential Valorization in the Pharmaceutical Industry
Source: MDPI journal article supplement (doi:10.3390/life11060544), 2021-06-10
Supplement: s1 [file s1]

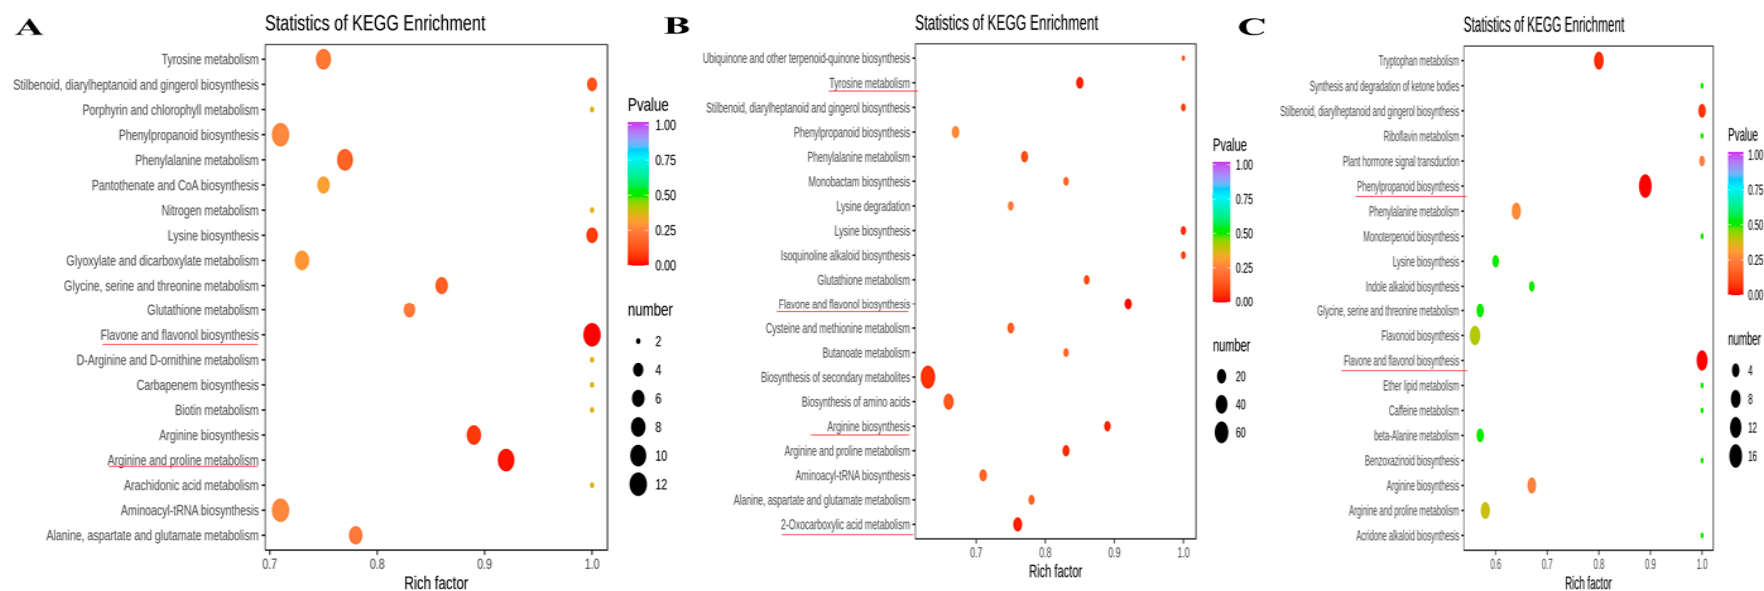

**Supplementary Figure S5:** Pathway enrichment by KEGG of differentially accumulated metabolites (DAMs) detected among the three pairwise groups. **(A)** KL\_vs\_KR. **(B)** KL\_vs\_KS. **(C)** KS\_vs\_KR. Pathways with p-values < 0.05 are underlined with red line.

Organs used comprised leaf, stem and root of *Kadsura coccinea* Lem designated as KL, KS and KR, respectively.
