# Supplementary material for: Extensive Metabolite Profiling in the Unexploited Organs of Black Tiger for Their Potential Valorization in the Pharmaceutical Industry
Source: MDPI journal article supplement (doi:10.3390/life11060544), 2021-06-10
Supplement: s1 [file s1]

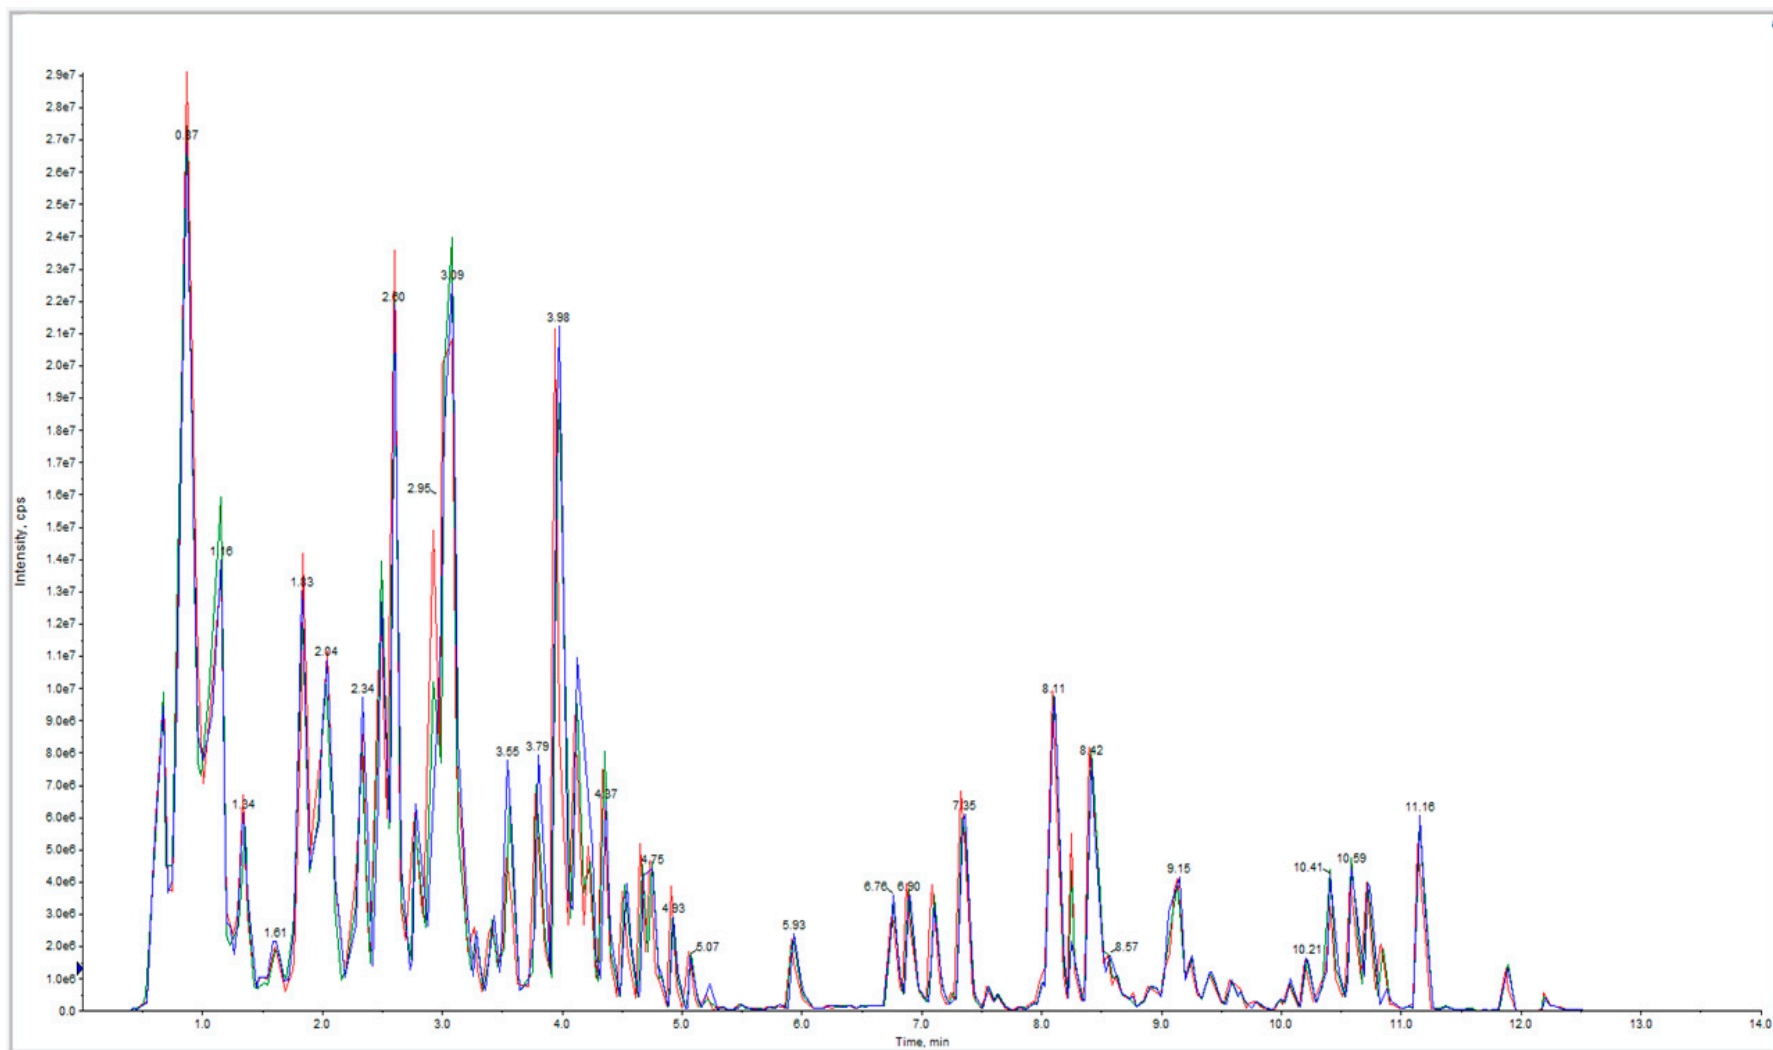

**Supplementary Figure S1.** UPLC-ESI-MS/MS system chromatograms of the three organs of *Kadsura coccinea* (Lem.) (Leaf, Stem and Root designated KL, KS and KR, respectively). The blue, red and green colors represent KL, KS and KR, respectively.
