# Supplementary material for: Extensive Metabolite Profiling in the Unexploited Organs of Black Tiger for Their Potential Valorization in the Pharmaceutical Industry
Source: MDPI journal article supplement (doi:10.3390/life11060544), 2021-06-10
Supplement: s1 [file s1]

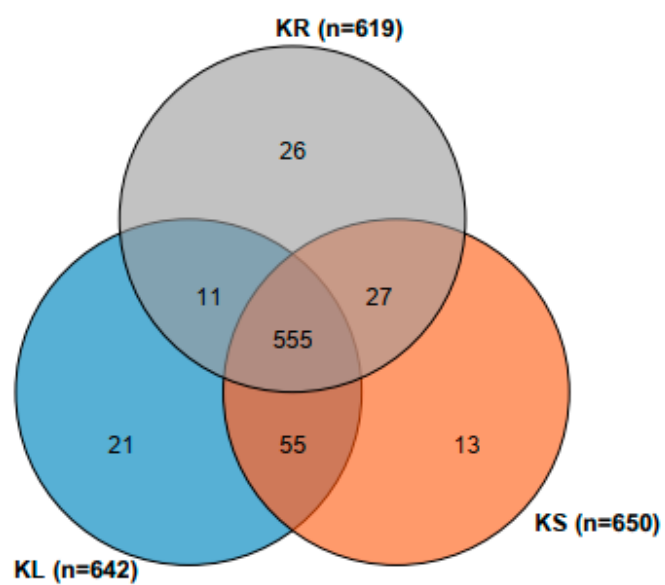

**Supplementary Figure S2:** Venn diagram of metabolites detected in each organ of *Kadsura coccinea* Lem: leaf, stem and root, represented by KL, KS and KR, respectively). Number of metabolites in each organ is denoted as n.
