# Supplementary material for: Extensive Metabolite Profiling in the Unexploited Organs of Black Tiger for Their Potential Valorization in the Pharmaceutical Industry
Source: Life (Basel). 2021 Jun 10;11(6):544. doi: 10.3390/life11060544 (PMC8229443; doi:10.3390/life11060544)
Supplement: Supplementary file 1 [file life-11-00544-s001.zip]

Archive with 8 entries (8 files):
- Supplementary Table S1.xlsx
- Supplementary Figure S1.pdf
- Supplementary Figure S2.pdf
- Supplementary Figure S3.pdf
- Supplementary Figure S4.tiff
- Supplementary Figure S5.pdf
- Supplementary Table S2.xlsx
- Supplementary Table S3.xlsx
