# Supplementary material for: Extensive Metabolite Profiling in the Unexploited Organs of Black Tiger for Their Potential Valorization in the Pharmaceutical Industry
Source: Life (Basel). 2021 Jun 10;11(6):544. doi: 10.3390/life11060544 (PMC8229443; doi:10.3390/life11060544)
Supplement: Supplementary file 1 [file life-11-00544-s001.zip › Supplementary Table S1.xlsx]

## Sheet: Table S1  
Supplementary Table S1: Ion intensities (untransformed) of metabolites mutually detected in at least two parts of Kadsura coccinea Lem (leaf (KL); stem (KS) and root (KR))
Index	Formula	Compounds	Class	KL	KS	KR
mws0005	C10H12N2	Tryptamine	Alkaloids	55602	47193.7	1.41783e+07
pmp001287	C8H9N	N-Benzylmethylene isomethylamine	Alkaloids	1072200	336337	604103
HJKP000649	C8H9NO	N-benzylformamide	Alkaloids	757143	306970	520663
pmb0774	C10H12N2O	Serotonin*	Alkaloids	661373	2.43857e+06	4.86543e+07
Hmmp001310	C11H9NO2	3-Indoleacrylic acid	Alkaloids	2574700	8.12627e+06	15394000
pme2024	C10H12N2O	Serotonin*	Alkaloids	700717	2605300	6.19703e+07
pmb0496	C15H22N4O3	N-Feruloylagmatine	Alkaloids	383777	165497	33663.3
Lmgp000796	C8H7NO2	4-Hydroxymandelonitrile	Alkaloids	17193	148343	359930
pmb2211	C19H38N2O3	Cocamidopropyl betaine	Alkaloids	14058.7	25329.7	22006
pmb2591	C13H14N2O3	N-(3-Indolylacetyl)-L-alanine	Amino acids and derivatives	1.44043e+06	77855	229323
mws0250	C9H11NO3	L-Tyrosine	Amino acids and derivatives	1.05773e+06	442477	716967
mws0254	C6H9N3O2	L-Histidine	Amino acids and derivatives	21779	138453	388497
mws0256	C5H11NO2	L-Valine	Amino acids and derivatives	3.37653e+06	5702000	9.09047e+06
mws0260	C6H14N4O2	L-Arginine	Amino acids and derivatives	71618	411153	1850500
Zmjp000182	C7H16N4O2	Homoarginine	Amino acids and derivatives	372067	3040700	3593600
Zmgn002106	C11H13NO3	N-Acetyl-L-phenylalanine	Amino acids and derivatives	117529	663207	249517
mws0219	C4H7NO4	L-Aspartic Acid	Amino acids and derivatives	524910	2.46497e+06	5.08803e+06
mws0216	C5H9NO3	Trans-4-Hydroxy-L-proline	Amino acids and derivatives	7825.67	57517.3	43322.7
mws0221	C6H12N2O4S2	L-Cystine	Amino acids and derivatives	9414.97	4427.3	2425.83
mws0582	C11H19N3O6S	S-(Methyl)glutathione	Amino acids and derivatives	17990	184683	138180
pme2914	C6H10O5	3-Hydroxy-3-methylpentane-1,5-dioic acid	Amino acids and derivatives	514700	651430	1.32287e+06
Lmhp002031	C12H24N2O3	L-Leucyl-L-Leucine	Amino acids and derivatives	10509.7	12937.7	62962.7
pme2735	C15H22N6O5S	S-Adenosyl-L-methionine	Amino acids and derivatives	64168.7	22118.3	16608
mws0520	C11H13NO4	N-Acetyl-L-tyrosine	Amino acids and derivatives	112537	244537	17630.3
pme3827	C9H11NO4	3,4-Dihydroxy-L-phenylalanine (L-Dopa)	Amino acids and derivatives	35464.7	10650.1	5354.33
pme2890	C8H16N2O4S2	L-Homocystine	Amino acids and derivatives	6843.63	4990.53	9426.37
Lmhp002001	C14H20N2O3	L-Valyl-L-Phenylalanine	Amino acids and derivatives	6951.53	14264.3	73430
pme2527	C5H12N2O2	L-Ornithine	Amino acids and derivatives	2016.07	50564.7	33644.7
mws0736	C8H16N2O3	L-Glycyl-L-isoleucine*	Amino acids and derivatives	15917	17034	66051.7
ML10181668	C6H11NO2	Cycloleucine*	Amino acids and derivatives	92433.7	6032700	2.12607e+06
Zmzn000113	C5H9NO4	O-Acetylserine	Amino acids and derivatives	294180	651817	1413900
mws0629	C13H16N2O5	L-Aspartyl-L-Phenylalanine	Amino acids and derivatives	7689.43	48739.3	41114
Zmyn000155	C7H14N2O3	N-α-Acetyl-L-ornithine	Amino acids and derivatives	431730	1.39353e+06	7.26747e+06
pme1002	C8H11NO	L-Tyramine	Amino acids and derivatives	60308.3	1.29827e+06	1.45007e+06
pme0278	C7H14N2O4	2,6-Diaminooimelic acid	Amino acids and derivatives	3153.57	10124.7	42210.7
pme0026	C6H14N2O2	L-Lysine	Amino acids and derivatives	4976.43	21966	70059
pme0021	C9H11NO2	L-Phenylalanine	Amino acids and derivatives	3238400	975633	1792900
mws5035	C15H22N2O3	L-Leucyl-L-phenylalanine	Amino acids and derivatives	9027.07	17176.7	29030.3
pme2559	C6H9NO5	N-Acetyl-L-Aspartic Acid	Amino acids and derivatives	8766.73	34311.3	12263
pme0008	C6H13N3O3	L-Citrulline	Amino acids and derivatives	183417	363337	1.81943e+06
pme0006	C5H9NO2	L-Proline	Amino acids and derivatives	1422000	1408100	3.05493e+06
pme0122	C8H16N2O3	L-Glycyl-L-isoleucine*	Amino acids and derivatives	18320	81732.7	144170
mws5041	C8H16N2O3	L-Glycyl-L-isoleucine*	Amino acids and derivatives	10801.5	14187.3	47462
mws5042	C11H14N2O3	L-Glycyl-L-phenylalanine	Amino acids and derivatives	29118	24944.7	38935
pme1210	C5H11NO2S	L-Methionine	Amino acids and derivatives	16588.7	141423	343213
pme0137	C7H12N2O4	N-Acetyl-L-Glutamine	Amino acids and derivatives	6.07083e+06	15339000	737800
pme0014	C5H9NO4	O-Acetylserine	Amino acids and derivatives	6.10093e+06	1.84273e+07	1.57627e+07
pme0010	C3H7NO3	L-Serine	Amino acids and derivatives	181710	297863	226703
pme0066	C3H7N3O2	Guanidinoacetate	Amino acids and derivatives	8755.87	8324.4	2220.2
pme0181	C7H11N3O2	3-Methyl-L-Histidine	Amino acids and derivatives	44462.7	38253.3	33563.3
mws4134	C20H32N6O12S2	Oxiglutatione	Amino acids and derivatives	64584.3	66016	86920.7
pme2122	C5H9N3	Histamine	Amino acids and derivatives	22943.3	24443	32750.7
Lmhp001670	C11H22N2O3	L-Valyl-L-Leucine	Amino acids and derivatives	15466.7	61512	176367
pme0075	C7H11NO5	N-Acetyl-L-glutamic acid	Amino acids and derivatives	351523	115753	458530
pme0193	C5H10N2O3	L-Glutamine	Amino acids and derivatives	284777	1.10214e+06	3615200
pme0170	C8H16N4O3	N-Acetyl-L-Arginine	Amino acids and derivatives	87416.7	60513	57769.7
mws1050	C5H9NO4	O-Acetylserine	Amino acids and derivatives	114317	151040	163280
pme3382	C6H11NO4	N-Acetyl-L-threonine	Amino acids and derivatives	41357.7	13193	5405.03
pme3388	C7H16N4O2	Homoarginine	Amino acids and derivatives	63586.7	551477	696987
pmb0468	C6H11NO3S	N-Formyl-L-Methionine	Amino acids and derivatives	991230	3.36583e+06	8.21323e+07
mws0282	C11H12N2O2	L-Tryptophan	Amino acids and derivatives	640427	2035900	6.60643e+06
NK10251888	C8H18N4O2	NG,NG-Dimethyl-L-arginine	Amino acids and derivatives	136757	206203	293327
Rfmb320	C7H13NO2	1-Methylpiperidine-2-carboxylic acid	Amino acids and derivatives	565490	524017	506183
Rfmb319	C6H11NO2	Cycloleucine*	Amino acids and derivatives	347853	2018700	688243
Hmqn003268	C15H12O7	5,7,3',4',5'-Pentahydroxydihydroflavone	Flavonoids	11016.7	9097.53	6634.27
Lmzp004885	C17H14O7	3,7-Di-O-methylquercetin	Flavonoids	33533.7	38117.7	18958.3
mws2209	C21H20O11	Luteolin-7-O-glucoside (Cynaroside)	Flavonoids	4.34333e+06	16028.7	7691.87
mws1002	C17H14O8	Syringetin	Flavonoids	22531.7	25838	179823
Lmjp002461	C27H30O16	Quercetin-3-O-rutinoside (Rutin)	Flavonoids	9.13457e+06	3.15237e+06	141803
pmp001135	C30H26O13	Biondnoid I	Flavonoids	456467	12604	2479.43
mws2627	C16H12O7	Tamarixetin (3,3',5,7-Tetrahydroxy-4'-Methoxyflavone)	Flavonoids	947750	25170	4582.77
Hmpn005101	C21H24O11	Sieboldin	Flavonoids	105763	288617	58130.7
Hmgp003086	C29H34O16	Tricin-7-O-rutinoside	Flavonoids	76935	43121.3	5558.4
mws1422	C15H14O5	Epiafzelechin	Flavonoids	85292.7	223963	31865
HJN055	C21H24O10	Phloretin-2'-O-glucoside (Phlorizin)	Flavonoids	5808500	8.95707e+06	4052500
mws1329	C21H20O12	6-Hydroxykaempferol-7-O-glucoside	Flavonoids	2.04463e+07	1003170	100559
Hmjp002999	C28H32O16	Isorhamnetin-3-O-neohesperidoside	Flavonoids	4008900	2069000	603270
Zmpn004068	C26H32O14	Phloretin-2'-O-(6''-O-xylosyl)glucoside	Flavonoids	1.20593e+06	1.96243e+06	1.20343e+06
Lmmp002796	C27H30O17	Myricetin--3-O-rutinoside	Flavonoids	2.13913e+06	840100	48485.3
Hmcp002298	C22H22O12	Limocitrin-3-O-arabinoside	Flavonoids	20706.3	21931	28925
pmb3042	C23H24O12	Tricin-5-O-Glucoside	Flavonoids	36611	139553	77143
HJAP006	C23H24O13	Limocitrin-7-O-glucoside	Flavonoids	343283	634740	610737
Xmsn002700	C21H22O12	Taxifolin-3'-O-glucoside	Flavonoids	170217	341830	35033.3
Lmtn002796	C21H22O11	Eriodictyol-7-O-glucoside	Flavonoids	3.84613e+06	3.88953e+06	5.29263e+06
pmp001079	C27H30O15	5,7-Dihydroxy-4-methoxyflavone-3-O-xylose-(1-6)-glucose	Flavonoids	3.06627e+06	387340	59273.7
Lmjp002867	C27H30O15	5,7-Dihydroxy-4-methoxyflavone-3-O-xylose-(1-6)-glucose	Flavonoids	4.87183e+06	542090	78865
Hmcp002187	C23H24O13	Limocitrin-7-O-glucoside	Flavonoids	353527	610557	658157
pme1201	C15H14O5	Epiafzelechin	Flavonoids	252263	223653	110710
pme0460	C15H14O6	Epicatechin	Flavonoids	66333.7	155580	126590
Lmlp005236	C21H22O11	Eriodictyol-7-O-glucoside	Flavonoids	711180	47798.7	11007.1
mws0856	C21H20O12	6-Hydroxykaempferol-7-O-glucoside	Flavonoids	2.69947e+07	1.32663e+06	109970
pme1540	C28H32O16	Isorhamnetin-3-O-neohesperidoside	Flavonoids	86895.7	128900	1.90873e+06
pme2459	C21H20O11	Luteolin-7-O-glucoside (Cynaroside)	Flavonoids	2.10857e+06	234887	40091.3
pmb0736	C23H24O12	Tricin-5-O-Glucoside	Flavonoids	233173	276683	82010.3
pme0376	C15H12O5	Garbanzol	Flavonoids	34286.3	7854.03	5623.27
HJAP061	C32H38O20	Quercetin-3-O-(2''-O-arabinosyl)rutinoside	Flavonoids	512683	141457	535677
pme0368	C27H30O14	Apigenin-7-O-rutinoside (Isorhoifolin)	Flavonoids	160230	139920	71646.7
mws2186	C20H18O11	Avicularin(Quercetin-3-O-α-L-arabinofuranoside)	Flavonoids	219010	37679.7	24315
Lmjp003044	C22H22O12	Limocitrin-3-O-arabinoside	Flavonoids	2.44083e+06	365980	136027
mws0917	C17H14O7	3,7-Di-O-methylquercetin	Flavonoids	4359.77	15379.3	56646.3
mws1173	C15H12O5	Garbanzol	Flavonoids	16279.3	19525.7	15474
Lmsn002815	C27H30O15	5,7-Dihydroxy-4-methoxyflavone-3-O-xylose-(1-6)-glucose	Flavonoids	2.72027e+06	222967	20703
mws0091	C21H20O12	6-Hydroxykaempferol-7-O-glucoside	Flavonoids	3.15143e+07	1.60177e+06	133243
mws1066	C27H32O14	Naringenin-7-O-Neohesperidoside(Naringin)*	Flavonoids	1463400	1.60383e+06	497560
pmp001309	C21H20O12	6-Hydroxykaempferol-7-O-glucoside	Flavonoids	3.35923e+06	992910	68458.7
Lmpp003465	C21H20O13	Myricetin-3-O-glucoside	Flavonoids	1.45984e+07	6.44503e+06	425277
Lmyp005280	C37H38O18	Isorhamnetin-3-O-[2'''-O-(6''-p-coumaryl)glucosyl]rhamnoside	Flavonoids	476757	13993.3	1277.59
mws0042	C15H14O7	Gallocatechin	Flavonoids	21141000	2.95483e+07	19250000
mws0046	C27H32O14	Naringenin-7-O-Neohesperidoside(Naringin)*	Flavonoids	1.24917e+06	1.34963e+06	427527
mws0044	C15H12O7	5,7,3',4',5'-Pentahydroxydihydroflavone	Flavonoids	189833	236473	151870
Lmjp002596	C26H28O16	Quercetin-3-O-sambubioside	Flavonoids	1.24033e+06	111917	28222.7
mws0049	C15H14O7	Gallocatechin	Flavonoids	1589100	3.08333e+06	1.49803e+06
pmp000593	C27H30O15	5,7-Dihydroxy-4-methoxyflavone-3-O-xylose-(1-6)-glucose	Flavonoids	2.56007e+06	267887	37208.7
Wmkp002590	C27H30O15	5,7-Dihydroxy-4-methoxyflavone-3-O-xylose-(1-6)-glucose	Flavonoids	23135.3	195323	153397
mws0054	C15H14O6	Epicatechin	Flavonoids	7.27557e+06	4.81357e+07	4.50317e+07
mws2118	C21H24O10	Phloretin-2'-O-glucoside (Phlorizin)	Flavonoids	4937500	7.97537e+06	3.43153e+06
mws0059	C27H30O16	Quercetin-3-O-rutinoside (Rutin)	Flavonoids	2667200	1.16883e+06	79240.3
pmp001314	C33H40O21	6-Hydroxykaempferol-3-O-rutin-6-O-glucoside	Flavonoids	13011	3259.53	12931.1
mws0066	C16H12O7	Tamarixetin (3,3',5,7-Tetrahydroxy-4'-Methoxyflavone)	Flavonoids	4096000	120587	23018.3
Hmmn003584	C33H40O19	Luteolin-7-O-rutinoside-5-O-rhamnoside	Flavonoids	1.87417e+07	173887	37983.3
pmp000013	C24H26O12	Eupatilin-7-O-glucoside	Flavonoids	47405.7	56765	9653.97
Xmyp004678	C32H38O19	Kaempferol-3-O-(2-O-Xylosyl-6-O-Rhamnosyl)Glucoside	Flavonoids	51739	21405	626080
Lmhn010327	C21H26O5	Kadsuralignan C	Lignans and Coumarins	4513.8	13372.3	1207940
Lmhn009112	C29H36O10	Kadsuralignan G	Lignans and Coumarins	12413.3	64248.3	3.29777e+07
Lmdn001925	C26H34O12	Olivil-4'-O-glucoside	Lignans and Coumarins	834143	4.99113e+06	162027
Cmsp005051	C26H34O11	Isolariciresinol-9-O-glucoside	Lignans and Coumarins	168373	315367	121167
Lmhn008988	C22H30O6	Kadangustin H	Lignans and Coumarins	1137.93	593.838	134710
Cmsn002480	C26H36O11	Secoisolariciresinol 4-O-glucoside	Lignans and Coumarins	7.24373e+06	4.22837e+06	571287
Lmbn001181	C22H28O15	Fraxetin-7,8-di-O-glucoside	Lignans and Coumarins	45788	54094.7	42240.3
Lmmn002274	C26H34O11	Isolariciresinol-9-O-glucoside	Lignans and Coumarins	6.26487e+06	7409800	64534.7
pmp000940	C23H28O7	Schisandrol B	Lignans and Coumarins	7801.83	55910.3	1.13587e+07
pmn001663	C22H26O8	Syringaresinol	Lignans and Coumarins	8269.67	91414.3	4380.5
Lmhp010252	C32H36O10	Kadangustin E	Lignans and Coumarins	27914.7	38596.3	1.30043e+07
Lmhp011565	C27H30O8	Kadusurain C	Lignans and Coumarins	6792.43	5459.6	13627000
Lmdn004267	C20H22O6	Matairesinol	Lignans and Coumarins	45542.3	458573	128997
mws0097	C20H22O6	Matairesinol	Lignans and Coumarins	51795.7	453543	131260
Lmtn003096	C26H36O11	Secoisolariciresinol 4-O-glucoside	Lignans and Coumarins	572447	1955400	163357
pmp000682	C26H32O11	Matairesinol-4'-O-glucoside (Matairesinoside)	Lignans and Coumarins	307023	4.25067e+06	221927
pmn001492	C11H8O3	Ayapin	Lignans and Coumarins	22459.7	286703	71734.7
pmn001378	C26H32O11	Matairesinol-4'-O-glucoside (Matairesinoside)	Lignans and Coumarins	453530	129270	22216.7
Hmlp003129	C20H22O6	Matairesinol	Lignans and Coumarins	8665.23	237723	93848.3
mws0120	C8H20NO6P	Choline Alfoscerate	Lipids	81368.3	195023	37526.7
mws0126	C26H54NO7P	LysoPC 18:0(2n isomer)	Lipids	246930	234410	118133
mws0367	C18H30O2	Crepenynic acid	Lipids	8.39547e+06	984610	302867
mws0366	C18H30O2	Crepenynic acid	Lipids	9.01943e+06	1.20827e+06	367593
pmb0296	C21H40O4	1-Oleoyl-Sn-Glycerol	Lipids	178300	18734	28506.7
pmb2221	C18H39NO3	4-Hydroxysphinganine	Lipids	362803	407367	545370
Zmyn005384	C18H36O3	2R-Hydroxyoctadecanoic Acid	Lipids	14432.7	27943	18080.7
Lmhp008513	C33H56O14	2-α-Linolenoyl-glycerol-1,3-di-O-glucoside	Lipids	124053	9265.13	5141.17
mws0383	C17H32O2	10-Heptadecenoic Acid	Lipids	151750	137413	100336
pmb2260	C23H46NO7P	LysoPC 15:1	Lipids	5685.47	5147.1	18213.7
Lmbn004685	C18H32O4	7S,8S-DiHODE; (9Z,12Z)-(7S,8S)-Dihydroxyoctadeca-9,12-dienoic acid	Lipids	53948.7	34123	132467
pmp001264	C16H35NO2	N-Lauryldiethanolamine	Lipids	6.55817e+06	5379700	4.79297e+06
Hmsn000210	C17H30O2	Methyl 7,10-hexadecadienoate	Lipids	838670	803043	482713
Lmhp008763	C21H42NO7P	LysoPE 16:1(2n isomer)	Lipids	79807	9037.47	114430
mws0396	C18H34O2	11-Octadecanoic acid(Vaccenic acid)	Lipids	3.69893e+06	2290800	1.14511e+06
mws1488	C16H32O2	Palmitic acid	Lipids	27284.7	23394.3	15263.3
pmp001251	C26H50NO7P	LysoPC 18:2(2n isomer)	Lipids	1.84327e+07	3.30933e+06	1.55613e+07
pmp001281	C26H52NO7P	LysoPC 18:1	Lipids	9516000	1.14587e+06	3.17523e+06
mws2623	C18H34O2	11-Octadecanoic acid(Vaccenic acid)	Lipids	852897	529823	276320
Wmmn002441	C10H16O3	(E)-Linalool-1-oic acid	Lipids	683137	343100	34215.3
pmp001284	C19H38O4	Monopalmitin	Lipids	13715.7	16574.3	9605.43
pmp001270	C24H48NO7P	LysoPC 16:1(2n isomer)	Lipids	1.26627e+06	89799.3	869233
Lmhp008744	C33H56O14	2-α-Linolenoyl-glycerol-1,3-di-O-glucoside	Lipids	133873	7684.43	4368.07
Lmhp008718	C25H48NO7P	LysoPE 20:2(2n isomer)	Lipids	155977	40058.3	150217
Lmhp008833	C24H48NO7P	LysoPC 16:1(2n isomer)	Lipids	1262800	89270.3	728527
Lmhp009802	C25H46NO7P	LysoPE 20:3	Lipids	10853.9	4550.7	18906
mws1436	C18H38O2	1,18-Octadecanediol	Lipids	2476.23	2332.37	1234.38
pmf0400	C22H44O2	Docosanoic acid (Behenic acid)	Lipids	133280	106836	172540
mws0119	C14H28O2	Myristic Acid	Lipids	1.03796e+07	1.21603e+07	6945700
mws0359	C15H30O2	Pentadecanoic Acid	Lipids	85306.7	144793	107424
Lmhp007840	C27H52NO7P	LysoPC 19:2	Lipids	4176.07	4265.17	11479.3
Lmhp008801	C23H42NO7P	LysoPE 18:3	Lipids	8397500	1.03363e+06	1247600
pme2827	C16H32O	Palmitaldehyde	Lipids	4893100	5.32983e+06	5.61593e+06
Lmbn005369	C18H32O3	12,13-Epoxy-9-Octadecenoic Acid	Lipids	512980	411257	358303
Lmbn005487	C18H34O4	12,13-DHOME; (9Z)-12,13-Dihydroxyoctadec-9-enoic acid	Lipids	113543	355980	516073
Lmhp012042	C21H38O4	1-Linoleoylglycerol	Lipids	42298.3	9230.2	14695.3
Lmbn005662	C18H32O3	12,13-Epoxy-9-Octadecenoic Acid	Lipids	171120	175320	124990
pmc0960	C28H50NO7P	LysoPC 20:4	Lipids	3031.87	5493.5	98562.7
Lmbn004240	C18H34O5	9,10-Dihydroxy-12,13-epoxyoctadecanoic acid	Lipids	2958.43	12045.4	2849.9
Lmhp010190	C26H52NO7P	LysoPC 18:1	Lipids	9.51327e+06	1118200	3.21887e+06
mws0752	C11H22O2	Undecylic Acid	Lipids	426870	407620	316327
Lmbn005443	C18H30O3	13-KODE; (9Z,11E)-13-Oxooctadeca-9,11-dienoic acid*	Lipids	15127.3	2122.87	1489.97
YC512118	C18H35NO	Oleamide (9-Octadecenamide)	Lipids	26851.7	37445.7	14726.7
Lmhp009187	C20H42NO7P	LysoPE 15:0	Lipids	3175.93	8723.43	15570.7
Lmhp009190	C33H58O14	1-Linoleoylglycerol-2,3-di-O-glucoside	Lipids	53888.3	9737.5	22660.3
pmb0855	C24H50NO7P	LysoPC 16:0(2n isomer)	Lipids	6786600	2273900	2.38033e+06
Lmhp011388	C21H36O4	1-α-Linolenoyl-glycerol	Lipids	350750	31662	6491.93
pmb0856	C23H46NO7P	LysoPC 15:1	Lipids	882257	220813	254720
Lmbn006152	C18H32O2	(9Z,11E)-Octadecadienoic acid	Lipids	16673	9706.43	8501.3
pmn001610	C20H36O2	Eicosadienoic acid	Lipids	50298.7	20872.3	22545.7
Rfmb091	C18H32O3	12,13-Epoxy-9-Octadecenoic Acid	Lipids	499200	403587	354647
pmf0297	C20H42O	1-Eicosanol	Lipids	28553.3	37743.3	26510
pmf0293	C18H38O	1-Octadecanol	Lipids	372080	395530	371897
pmb0876	C21H44NO7P	LysoPE 16:0(2n isomer)	Lipids	1.31947e+06	562670	1000630
Hmyn007168	C22H45O9P	LysoPG 16:0	Lipids	1.33633e+06	1.10625e+06	877060
Rfmb087	C18H32O4	7S,8S-DiHODE; (9Z,12Z)-(7S,8S)-Dihydroxyoctadeca-9,12-dienoic acid	Lipids	69929	93009	128080
pmb0874	C23H44NO7P	LysoPE 18:2	Lipids	23441000	5.51637e+06	1.77193e+07
Lmhp010040	C25H46NO7P	LysoPE 20:3	Lipids	9471.23	4283.23	20408
Lmhp010162	C22H46NO7P	LysoPE 17:0	Lipids	22510.3	39251.7	7202.97
Zmyn004714	C18H34O3	Ricinoleic acid	Lipids	25974.3	32661.3	24382.3
pmb2804	C18H32O4	7S,8S-DiHODE; (9Z,12Z)-(7S,8S)-Dihydroxyoctadeca-9,12-dienoic acid	Lipids	108280	179207	300047
pmb0865	C26H48NO7P	LysoPC 18:3(2n isomer)	Lipids	19253000	1.57463e+06	2.47997e+06
pmb0864	C19H40NO7P	LysoPE 14:0(2n isomer)	Lipids	7520.03	6673.83	9744.23
pmb0863	C24H46NO7P	LysoPC 16:2(2n isomer)	Lipids	93948.3	5581.87	83480.3
Lmhp112042	C21H38O4	1-Linoleoylglycerol	Lipids	19069	17610.3	12436.3
Lmqn008288	C18H36O3	2R-Hydroxyoctadecanoic Acid	Lipids	199807	421077	100904
pmd0147	C28H54NO7P	LysoPC 20:2(2n isomer)	Lipids	27071.7	5186.53	10004.8
pmd0146	C28H54NO7P	LysoPC 20:2(2n isomer)	Lipids	17533.7	2559.6	4987.8
Lmhp009034	C21H42NO7P	LysoPE 16:1(2n isomer)	Lipids	86836.7	11885.7	119660
Hmqp006235	C26H46NO7P	LysoPC 18:4	Lipids	23273.7	2579.8	8994.9
pmb0881	C23H44NO7P	LysoPE 18:2	Lipids	2.34103e+07	5.35457e+06	1.76813e+07
pmb0889	C18H30O2	Crepenynic acid	Lipids	654960	801300	470200
pmb0883	C23H48NO7P	LysoPC 15:0	Lipids	26484.3	15305.7	8956.07
Lmhp009129	C23H48NO7P	LysoPC 15:0	Lipids	14144.7	11318.5	26316.7
Lmhp011562	C21H36O4	1-α-Linolenoyl-glycerol	Lipids	85111.3	37524.7	11409.7
Lmhp009384	C33H58O14	1-Linoleoylglycerol-2,3-di-O-glucoside	Lipids	40587.7	9676.2	32698
pmd0130	C22H46NO7P	LysoPE 17:0	Lipids	30175	8526.5	13279.3
pmd0132	C24H50NO7P	LysoPC 16:0(2n isomer)	Lipids	1278500	302853	228650
pmd0136	C26H54NO7P	LysoPC 18:0(2n isomer)	Lipids	19689.3	23246.3	5476.47
Lmbn005287	C18H32O4	7S,8S-DiHODE; (9Z,12Z)-(7S,8S)-Dihydroxyoctadeca-9,12-dienoic acid	Lipids	7515.6	311033	78759.3
Lmhp009349	C25H44NO7P	LysoPE 20:4(2n isomer)	Lipids	4798.57	3975.77	17640.3
Lmhp009464	C22H44NO7P	LysoPE 17:1(2n isomer)	Lipids	21723.7	9088.13	41342
Lmhp009590	C25H50NO7P	LysoPC 17:1	Lipids	425600	67958.7	238630
Lmhp010334	C27H48O9	1-Linoleoylglycerol-3-O-glucoside	Lipids	48796.7	11099.6	4346.3
Lmbn003970	C18H34O5	9,10-Dihydroxy-12,13-epoxyoctadecanoic acid	Lipids	331163	2556800	1.14587e+06
Lmhp010573	C27H48O9	1-Linoleoylglycerol-3-O-glucoside	Lipids	47576.7	10441.4	5149.73
pmn001691	C18H32O5	9,12,13-Trihydroxy-10,15-octadecadienoic acid	Lipids	30652.7	20132.3	6295.07
Lmhp008273	C20H40NO7P	LysoPE 15:1	Lipids	870.55	652.753	16252
pmn001694	C18H34O5	9,10-Dihydroxy-12,13-epoxyoctadecanoic acid	Lipids	201253	1.60233e+06	703117
pmb1650	C18H30O2	Crepenynic acid	Lipids	8.39663e+06	1.11313e+07	5.01473e+06
pmd0160	C21H44NO7P	LysoPE 16:0(2n isomer)	Lipids	106360	41786	45610
pmn001689	C18H32O4	7S,8S-DiHODE; (9Z,12Z)-(7S,8S)-Dihydroxyoctadeca-9,12-dienoic acid	Lipids	55921.3	31300.3	125387
Lmbn005923	C18H30O2	Crepenynic acid	Lipids	167833	21711	6364.7
pmb2640	C12H24O2	Dodecanoic acid (Lauric acid)	Lipids	222390	237583	134960
pmb2406	C25H52NO7P	LysoPC 17:0(2n isomer)	Lipids	36311	49933.3	46175
Lmhp008337	C19H40NO7P	LysoPE 14:0(2n isomer)	Lipids	3609.4	1191.05	4274.53
mws1491	C18H32O2	(9Z,11E)-Octadecadienoic acid	Lipids	3.13027e+07	2.05233e+07	1.73403e+07
mws0289	C23H46NO7P	LysoPC 15:1	Lipids	734747	191043	223597
pmb2791	C18H30O4	9-Hydroperoxy-10E,12,15Z-octadecatrienoic acid	Lipids	13866.3	12616.7	13510
pmb2792	C18H30O3	13-KODE; (9Z,11E)-13-Oxooctadeca-9,11-dienoic acid*	Lipids	85862.3	52365.3	87732.3
pmb2319	C23H48NO7P	LysoPC 15:0	Lipids	9305.13	5813.3	11778.7
pmb2799	C18H32O3	12,13-Epoxy-9-Octadecenoic Acid	Lipids	34798.7	37110	28649
Lmhp008589	C23H42NO7P	LysoPE 18:3	Lipids	8.39827e+06	1042830	1.24717e+06
pmb1452	C16H35NO2	N-Lauryldiethanolamine	Lipids	27898.7	30966.3	26169.3
pmb2789	C18H30O4	9-Hydroperoxy-10E,12,15Z-octadecatrienoic acid	Lipids	91997.3	36648.3	47963
Lmhp010514	C25H48NO7P	LysoPE 20:2(2n isomer)	Lipids	18463	2906.2	2657.83
Lmhp010515	C25H52NO7P	LysoPC 17:0(2n isomer)	Lipids	7001.93	10455.1	4125.4
Lmhp009526	C27H46O9	2-α-Linolenoyl-glycerol-1-O-glucoside	Lipids	328233	26945	5400.53
Zmjn003398	C12H20O4	2-Dodecenedioic acid	Lipids	28181.3	29261	23644
Lmhp009890	C28H52NO7P	LysoPC 20:3	Lipids	22385	5851.77	46621.7
Zmgn003633	C12H20O3	12-Oxo-10E-Dodecenoic Acid	Lipids	26087.3	2619.83	1617.53
Lmhp007598	C27H52NO7P	LysoPC 19:2	Lipids	21670	18162.7	23489.7
Lmhp009773	C27H46O9	2-α-Linolenoyl-glycerol-1-O-glucoside	Lipids	308707	23407.3	4761.27
Zmjn004133	C18H32O4	7S,8S-DiHODE; (9Z,12Z)-(7S,8S)-Dihydroxyoctadeca-9,12-dienoic acid	Lipids	28508	55018.3	67526.7
Zmpn003368	C18H30O3	13-KODE; (9Z,11E)-13-Oxooctadeca-9,11-dienoic acid*	Lipids	521140	27074.3	13067.3
mws0248	C9H12N2O6	Uridine	Nucleotides and derivatives	66993.7	80909.3	38733.7
mws0255	C4H5N3O	Cytosine	Nucleotides and derivatives	15000.3	14214	18977.3
mws0884	C10H12N5O6P	Cyclic 3',5'-Adenylic acid	Nucleotides and derivatives	3371.5	4295.43	9451
mws0668	C10H12N4O6	Xanthosine	Nucleotides and derivatives	52846	688040	149080
ML10180524	C9H13N3O5	Cytarabine	Nucleotides and derivatives	25819.3	43045	29531.7
mws0675	C11H15N2O8P	β-Nicotinamide mononucleotide	Nucleotides and derivatives	14515.9	6747.37	15457.7
pme0230	C10H13N5O4	2'-Deoxyguanosine	Nucleotides and derivatives	6482900	6002000	4930600
pme2651	C21H28N7O17P3	NADP (Nicotinamide adenine dinucleotide phosphate)	Nucleotides and derivatives	159850	62259	44991.7
mws0847	C6H7N5	1-Methyladenine	Nucleotides and derivatives	75870	55102.3	63319.3
pme3732	C9H13N3O5	Cytarabine	Nucleotides and derivatives	157533	110648	116190
pme3961	C10H13N5O3	2'-Deoxyadenosine	Nucleotides and derivatives	64171	56432.3	128917
mws0863	C5H11O7P	2-Deoxyribose-5'-phosphate	Nucleotides and derivatives	16050.7	8069.23	6690.8
pme3967	C12H17N5O5	2-(Dimethylamino)guanosine	Nucleotides and derivatives	29831	52987.7	51573.7
pme0264	C10H14N2O5	Thymidine	Nucleotides and derivatives	7864.73	14932	43704
pme1474	C11H15N5O3S	5'-Deoxy-5'-(methylthio)adenosine	Nucleotides and derivatives	253827	526920	1346900
pmb0964	C16H23N5O5	Isopentenyladenine-7-N-glucoside	Nucleotides and derivatives	301963	107334	142703
pme0257	C4H4N2O2	Uracil	Nucleotides and derivatives	285783	207490	136433
pme1109	C5H5N5O	Isoguanine	Nucleotides and derivatives	45156	44547	24062.3
pmb0998	C10H14N5O8P	Guanosine 5'-monophosphate	Nucleotides and derivatives	9789.8	7245.37	9765.17
pmb0981	C10H14N5O7P	Adenosine 5'-monophosphate	Nucleotides and derivatives	242580	170700	347557
pmb2922	C15H24N2O17P2	Uridine 5'-diphospho-D-glucose	Nucleotides and derivatives	400930	1640000	1.75963e+06
pmb0530	C21H27N7O14P2	Nicotinic acid adenine dinucleotide	Nucleotides and derivatives	183443	39272	64766
pme0183	C5H5N5O	Isoguanine	Nucleotides and derivatives	21769.7	16588.7	21384.3
pme3337	C14H17N5O8	Succinyladenosine	Nucleotides and derivatives	185667	334227	218460
pme2117	C10H15N5O10P2	Adenosine 5'-diphosphate	Nucleotides and derivatives	66528.7	23916.7	16700.3
pme0040	C5H5N5	Adenine	Nucleotides and derivatives	1401400	387930	396263
mws1060	C10H12N4O5	9-(Arabinosyl)hypoxanthine	Nucleotides and derivatives	136643	723890	109238
pme1194	C9H13N3O4	2'-Deoxycytidine	Nucleotides and derivatives	10396	13768	46121.3
Zmfn000481	C14H22N2O16P2	Uridine-5'-Diphosphate-D-Xylose	Nucleotides and derivatives	64907.7	171027	247170
pmc0274	C6H6N4S	6-Methylmercaptopurine	Nucleotides and derivatives	2.58333e+06	864247	1447400
pmb2507	C5H11O7P	2-Deoxyribose-5'-phosphate	Nucleotides and derivatives	29288	19406	23871.3
pme1184	C10H13N5O4	2'-Deoxyguanosine	Nucleotides and derivatives	18017	18606	58174.3
pme3007	C9H14N2O12P2	Uridine 5'-diphosphate	Nucleotides and derivatives	8528.87	11947	10916.7
pme1178	C10H13N5O5	Guanosine	Nucleotides and derivatives	738027	849583	613557
pme3184	C10H14N5O6P	2'-Deoxyadenosine-5'-monophosphate	Nucleotides and derivatives	359837	412377	189693
pmc0066	C10H13N4O7P	2'-Deoxyinosine-5'-monophosphate	Nucleotides and derivatives	292203	1.55867e+06	119367
pme3188	C9H13N2O9P	Uridine 5'-monophosphate	Nucleotides and derivatives	4935.67	5988.37	10538.3
Lmqp000329	C8H14N3O7P	5-Aminoimidazole ribonucleotide	Nucleotides and derivatives	217493	53161	15558.7
pme2060	C10H13N5	N6-Isopentenyladenine	Nucleotides and derivatives	5753.6	5921.23	17891
Wmzn000227	C6H10O4	2,2-Dimethylsuccinic acid	Organic acids	3273.4	123617	141857
mws0242	C8H14O4	Suberic Acid	Organic acids	28739	215237	36144.7
pme3096	C3H5NO4	Aminomalonic acid	Organic acids	676700	417967	559950
mws0258	C6H13NO2	6-Aminocaproic acid	Organic acids	4.98203e+06	3212900	8.14963e+06
mws0262	C4H6O6	L-Tartaric acid	Organic acids	73535.7	50491	12501.7
mws0147	C5H10O3	β-Hydroxyisovaleric acid	Organic acids	70342	61778.7	97453.7
pmb3101	C7H12O5	3-Isopropylmalic Acid*	Organic acids	248147	102494	254090
mws0277	C7H12O6	Quinic Acid	Organic acids	4829700	9.01157e+06	15085000
mws0154	C7H10O5	Shikimic acid	Organic acids	2.55203e+06	904507	737493
mws0275	C4H6O5	3-Dehydro-L-Threonic Acid*	Organic acids	2.14617e+07	20335000	1.23867e+07
Lmbn000198	C4H6O5	3-Dehydro-L-Threonic Acid*	Organic acids	5496600	5082600	2957000
Lmbn001288	C5H8O4	Dimethylmalonic acid*	Organic acids	70115.7	29645.7	12705.3
mws0567	C5H11N3O2	4-Guanidinobutyric acid	Organic acids	912090	424627	515957
mws0208	C6H10O4	2,2-Dimethylsuccinic acid	Organic acids	269640	420393	409423
Lmbn001467	C7H13NO3	5-Acetamidopentanoic Acid	Organic acids	13390.3	79034	29960.3
Lmbn003524	C9H16O3	9-Oxononanoic acid	Organic acids	15468	21223	23837
mws0336	C6H6N2O2	Urocanic acid	Organic acids	1.62213e+06	606980	430240
mws0576	C4H8O3	3-Hydroxybutyric acid	Organic acids	133910	552707	138220
Zmzn000078	C3H7O6P	DL-Glyceraldehyde-3-phosphate	Organic acids	31910.3	35727.7	43542.3
ML10176345	C7H8O5	3-Dehydroshikimic acid	Organic acids	266743	375673	114140
mws0344	C5H10O6	D-Xylonic acid	Organic acids	1.45643e+06	1517800	939060
mws0227	C6H13NO2	6-Aminocaproic acid	Organic acids	5.00053e+06	4.82747e+06	7483900
Lmgn000160	C4H8N2O3	3-Ureidopropionic Acid	Organic acids	1269.47	3465.57	11039.9
mws0470	C4H6O4	D-Erythronolactone	Organic acids	1.96233e+07	1.19907e+07	16150000
mws0474	C12H22O4	Dodecanedioic aicd	Organic acids	893.627	2845.57	678.143
mws0473	C5H8O4	Dimethylmalonic acid*	Organic acids	96148.7	333327	74392.7
mws0230	C4H9NO3	L-Homoserine*	Organic acids	115372	615730	621803
mws0237	C9H16O4	Azelaic acid	Organic acids	595687	6.25417e+06	1.89873e+06
Lmmn000806	C5H8O4	Dimethylmalonic acid*	Organic acids	71249.3	32289	11603.7
Lmbn001364	C5H8O4	Dimethylmalonic acid*	Organic acids	72818	28199.3	11930
pme3705	C6H10O7	D-Galacturonic acid*	Organic acids	242540	325203	243877
Lmbn002072	C7H12O4	2-Propylsuccinic acid*	Organic acids	11245.4	53424	38131
pmp001198	C6H13NO2	6-Aminocaproic acid	Organic acids	299467	277437	419577
Lmmn003323	C16H32O3	2-Hydroxyhexadecanoic acid	Organic acids	140030	861800	412147
mws0671	C4H9NO3	L-Homoserine*	Organic acids	109501	645897	597973
pme1730	C4H6O4	D-Erythronolactone	Organic acids	49351.7	9713	9135.5
pme1975	C3H4O4	Tartronate semialdehyde	Organic acids	104058	678397	148400
ML10171848	C5H8O5	3-Methylmalic acid*	Organic acids	108620	63360.7	82263.7
MA10039492	C6H6O6	Trans-Citridic acid	Organic acids	3.64623e+06	1.53603e+06	1.2284e+06
pme0274	C6H13NO2	6-Aminocaproic acid	Organic acids	264363	264207	480730
pme0275	C5H8O3	4-Oxopentanoic Acid	Organic acids	3091.1	6331.63	3815.97
mws0924	C6H10O4	2,2-Dimethylsuccinic acid	Organic acids	247740	359983	321280
mws4052	C4H7NO2	1-Aminocyclopropane-1-carboxylic acid	Organic acids	44529.3	245200	161820
pme0490	C6H5NO2	2-Picolinic acid	Organic acids	31435	41865.7	23029
mws0823	C5H8O3	4-Oxopentanoic Acid	Organic acids	14985	40875	16638.7
Zmyn000247	C5H8O5	3-Methylmalic acid*	Organic acids	76808.3	67694.7	102651
pme0243	C5H8O4	Dimethylmalonic acid*	Organic acids	82675	314813	65378.3
Lmbn001609	C6H10O4	2,2-Dimethylsuccinic acid	Organic acids	13660.7	32683.7	18874.7
pme1216	C6H5NO2	2-Picolinic acid	Organic acids	19018.7	17648.3	12520.7
Zmyn000453	C6H8O7	Isocitric Acid	Organic acids	2.68647e+06	4719900	8.11567e+06
pme3207	C6H6O4	Muconic acid	Organic acids	1.84993e+06	1672800	3.34967e+06
Zmjn001813	C7H12O4	2-Propylsuccinic acid*	Organic acids	9547.97	46491.7	31503
pme0281	C8H6O4	Phthalic acid	Organic acids	158020	178070	209833
pme0282	C8H6O4	Phthalic acid	Organic acids	21619	88185.3	24788.7
Lmbn000216	C5H8O5	3-Methylmalic acid*	Organic acids	51769.3	45805	70510.3
pme3011	C4H9NO2	γ-Aminobutyric acid	Organic acids	61506.7	337167	1.04323e+06
mws1189	C6H10O7	D-Galacturonic acid*	Organic acids	217323	291980	218527
pme3017	C4H9NO2	γ-Aminobutyric acid	Organic acids	716243	1075000	1096400
Lmbp000668	C6H5NO2	2-Picolinic acid	Organic acids	31129.7	39051.3	21660.7
pme3009	C6H6O6	Trans-Citridic acid	Organic acids	153643	137114	114228
pme2380	C5H6O5	α-Ketoglutaric acid	Organic acids	52782.7	135200	130143
pme3186	C3H7O6P	DL-Glyceraldehyde-3-phosphate	Organic acids	18325.7	58165.7	58029.3
Lmbn001754	C7H12O5	3-Isopropylmalic Acid*	Organic acids	247717	104971	260387
mws0281	C6H8O7	Isocitric Acid	Organic acids	9560600	1.29743e+07	2.01873e+07
Zmgn000217	C5H6O4	Methylenesuccinic acid	Organic acids	15135.7	19092.7	19469.4
mws2125	C3H5O6P	Phosphoenolpyruvate	Organic acids	89269.3	118013	82232.3
mws0192	C4H6O4	D-Erythronolactone	Organic acids	16513000	10175600	13451000
pme3033	C4H9NO2	γ-Aminobutyric acid	Organic acids	83773.3	259517	650387
Zmgn001448	C7H12O5	3-Isopropylmalic Acid*	Organic acids	261397	96813.3	267367
mws1337	C9H17NO5	D-Pantothenic Acid	Others	517013	1.21783e+06	961783
mws0133	C6H6N2O	Nicotinamide	Others	138660	47208	32322
mws1589	C18H32O16	D-Melezitose	Others	951810	72255	225897
mws1593	C24H42O21	D-Maltotetraose	Others	28043.7	7724.33	30307.7
mws0264	C12H22O11	D-Maltose*	Others	1.88497e+06	388360	691223
Lmsn000381	C12H22O11	D-Maltose*	Others	1.44478e+06	319397	837590
HJN012	C20H26O7	4,7,9,9'-Tetrahydroxy-3,3'-dimethoxy-8-O-4'-neolignan	Others	89369.3	826490	373243
pme0516	C6H12O6	Inositol	Others	839460	641390	546470
pme0519	C12H22O11	D-Maltose*	Others	3548600	1.32923e+06	1.56043e+06
Zmzn000079	C4H9O7P	D-Erythrose-4-phosphate	Others	13012	14346.7	8468.93
mws2523	C12H23O14P	Trehalose 6-phosphate	Others	16006.7	7720.93	12499.7
pma3101	C11H14NO6+	Nicotinate D-ribonucleoside	Others	364783	653417	1.11237e+06
mws0232	C17H20N4O6	Riboflavin (Vitamin B2)	Others	521790	94215.7	46214
mws0889	C4H8O5	D-Threonic Acid	Others	234520	174190	241300
pme0534	C6H12O7	Gluconic acid	Others	1114600	1.32353e+06	2.06133e+06
mws2608	C8H15NO6	N-Acetyl-D-mannosamine*	Others	218670	190003	194260
Zmyn000083	C6H14O12P2	D-Glucose 1,6-bisphosphate*	Others	5085	9693.9	8187.8
pmb3079	C8H16NO9P	N-Acetyl-D-glucosamine-1-phosphate	Others	49232	34155.3	20548.7
Xmhn008097	C30H46O4	Seco-coccinic acid F	Others	519487	308830	599027
pme2755	C8H15NO6	N-Acetyl-D-mannosamine*	Others	260650	243007	224590
mws0866	C6H13O9P	D-Fructose 6-phosphate*	Others	441863	793243	663553
mws4163	C24H42O21	D-Maltotetraose	Others	131247	70897.3	169353
mws4170	C6H12O6	Inositol	Others	3.68243e+06	1.64417e+06	2336100
mws4175	C6H8O6	D-Glucurono-6,3-lactone	Others	54567.3	34432	88360
mws4174	C8H15NO6	N-Acetyl-D-mannosamine*	Others	29533.7	34928	23079
pmp000939	C22H24O8	Plaunol E	Others	9429.97	75874.3	1.58933e+07
mws5038	C12H22O11	D-Maltose*	Others	2.95233e+06	420727	987567
Hmcn000192	C7H14O7	Sedoheptulose	Others	414293	317873	165463
mws5040	C12H21O11Na	Turanose	Others	3259700	845000	1728700
Zmyn000110	C6H14NO8P	D-Glucosamine 1-phosphate	Others	8349.87	8581.8	2599.4
Xmhn008154	C27H34O8	Isovaleroyl-binankadsurin A	Others	690460	440810	726610
Zmyn000108	C6H10O8	D-Saccharic acid*	Others	586090	524560	233590
pme1383	C8H11NO3	Pyridoxine	Others	154050	366883	539837
pme2596	C8H9NO4	4-Pyridoxic acid	Others	275553	132720	33388
pme3311	C6H14O12P2	D-Glucose 1,6-bisphosphate*	Others	30709	31817.7	32861
pme1014	C31H40O2	Menatetrenone (Vitamin K2)	Others	96013.7	120177	32421.7
pme3313	C6H13O9P	D-Fructose 6-phosphate*	Others	193187	301370	263783
pmb0789	C14H21NO8	Pyridoxine-5'-O-glucoside	Others	1.49127e+06	1.41337e+06	657023
pmb0786	C6H13NO5	D-Glucosamine	Others	14623.2	18101.3	18979.3
mws1080	C12H22O11	D-Maltose*	Others	8.53157e+06	3.01167e+06	3694300
mws1090	C6H13O9P	D-Fructose 6-phosphate*	Others	342830	623907	543917
mws1499	C5H10O5	D-Ribose	Others	244117	70064.3	52672.7
Zmpn000199	C6H10O8	D-Saccharic acid*	Others	637653	525520	188330
Zmhn001970	C20H22O8	Piceid	Others	50251.3	98505	170543
Zmpn000095	C6H15O9P	Sorbitol-6-phosphate	Others	26899.7	6371.93	12708.2
mws1164	C6H12O6	Inositol	Others	3936000	1.80857e+06	2.18037e+06
mws1336	C7H7NO2	Anthranilic Acid	Phenolic acids	333570	48668.3	61225.3
Lmhn002926	C13H12O7	p-Coumaroylmalic acid	Phenolic acids	2027100	233263	9074.1
mws0009	C10H10O3	Coniferaldehyde	Phenolic acids	39732	74540.7	35183.3
Lmgn001670	C7H6O3	Salicylic acid	Phenolic acids	10222.6	522427	186110
Zmhn000785	C19H32O16	Di-O-Glucosylquinic acid	Phenolic acids	1.31223e+07	2.22157e+06	2.36503e+06
mws0014	C10H10O4	Dimethyl Phthalate	Phenolic acids	86334.7	67665.7	491067
Hmgp001944	C29H36O15	Isoacteoside	Phenolic acids	99678.3	53115.3	19579.7
HJN003	C17H22O10	4-O-Glucosyl-sinapate	Phenolic acids	373200	364470	42258
Zmhn001883	C14H18O9	Vanillic acid-4-O-glucoside	Phenolic acids	1.58823e+06	1.21717e+06	1156600
MA10002917	C6H4N2O5	2,4-Dinitrophenol	Phenolic acids	19043.3	33276	22903.7
pme3083	C8H7NO3	2-(Formylamino)benzoic acid	Phenolic acids	65992.7	122990	35334.7
mws1350	C9H10O4	Syringaldehyde; 4-Hydroxy-3,5-Dimethoxybenzaldehyde	Phenolic acids	62001.3	318113	28826.7
mws0024	C7H6O5	Gallic acid	Phenolic acids	784500	5.62053e+06	206377
mws0028	C8H8O4	Vanillic acid	Phenolic acids	12133	679987	156180
pmb2497	C9H10O5	4-Hydroxy-3-methoxymandelate	Phenolic acids	12339.3	17103.7	21551.3
mws2212	C9H8O4	Caffeic acid	Phenolic acids	66595.3	98131.3	20744.3
pma0149	C15H16O9	Sinapoyl malate	Phenolic acids	25427	81737	29457
mws0159	C9H8O3	Caffeic aldehyde	Phenolic acids	160270	23230	32477
pmb0069	C7H7NO	Benzamide	Phenolic acids	40291	90715.7	894123
Zmhn001793	C15H18O9	6-O-Caffeoyl-D-glucose	Phenolic acids	484917	1.98407e+06	546103
HJN037	C8H8O5	3-O-Methylgallic Acid	Phenolic acids	504340	242820	23688.7
pmp001285	C8H4O3	Phthalic anhydride	Phenolic acids	609820	807870	349057
NK10252689	C7H7NO4	2-Methoxy-5-nitrophenol	Phenolic acids	6157.33	31196.7	10651.6
mws0458	C8H8O3	p-Hydroxyphenyl acetic acid	Phenolic acids	212473	1.46747e+06	1565600
Lmlp012720	C16H22O4	Diisobutyl phthalate*	Phenolic acids	24890000	31357000	1.46477e+07
Zmjn002583	C8H8O4	Vanillic acid	Phenolic acids	380890	22298.7	10253.8
pmb3142	C13H16O8	4-O-Glucosyl-4-hydroxybenzoic acid	Phenolic acids	1664800	993930	102076
Cmjn004337	C18H26O10	Benzyl-(2''-O-xylosyl)glucoside	Phenolic acids	480570	293160	45538
Zmhn002301	C15H18O8	p-Coumaric acid-4-O-glucoside	Phenolic acids	1.76227e+06	3.10623e+06	50649.3
Zmhn002422	C16H20O9	1-O-Feruloyl-D-Glucose	Phenolic acids	7314000	504817	44066
Lmhn003074	C14H14O8	Feruloylmalic acid	Phenolic acids	70964	21096.7	5702.17
pme1816	C16H18O9	Cryptochlorogenic acid	Phenolic acids	23661000	64985	22302.7
Zmln000899	C15H20O9	Dihydrocaffeoylglucose	Phenolic acids	272480	84812.3	30276.7
Zmdn001863	C18H14O6	2-(7-Dihydroxyl)-benzofuranyl-ferulic acid	Phenolic acids	1.68943e+06	701543	24650.7
mws0885	C7H6O4	2,5-Dihydroxybenzoic acid; Gentisic Acid*	Phenolic acids	1.43347e+06	19768000	731430
pmp001086	C6H6O3	5-Hydroxymethylfurfural	Phenolic acids	49843	214917	118362
Zmhn001358	C13H16O8	4-O-Glucosyl-4-hydroxybenzoic acid	Phenolic acids	182700	443380	55053
mws0898	C10H12O2	Isoeugenol	Phenolic acids	76106.7	12342.7	202187
pme0309	C8H8O5	3-O-Methylgallic Acid	Phenolic acids	325500	170617	23305
NK10253223	C8H9NO3	2-Amino-3-methoxybenzoic acid	Phenolic acids	15179	7889.73	4936.97
Zmzn002575	C6H5NO3	2-Nitrophenol	Phenolic acids	204440	741413	24849.3
pmb3074	C16H18O8	5-O-p-Coumaroylquinic acid*	Phenolic acids	3.43453e+06	98313.3	17062
Hmln000873	C13H16O10	2-O-Galloyl-glucose	Phenolic acids	2.45923e+06	8.22533e+06	12706000
pmb3068	C16H18O8	5-O-p-Coumaroylquinic acid*	Phenolic acids	3.97933e+07	67064	103910
Lmtn002565	C14H18O9	Vanillic acid-4-O-glucoside	Phenolic acids	2.17153e+06	287553	93051
pmf0440	C10H10O2	4-MethoxycinnaMaldehyde	Phenolic acids	140443	118010	114957
pme1611	C21H22O10	6-O-Caffeoylarbutin	Phenolic acids	1.44803e+06	480327	51517.3
pmb3056	C16H20O9	1-O-Feruloyl-D-Glucose	Phenolic acids	3.45553e+07	14535.6	49814.7
pmb3055	C22H26O14	p-Coumaroylquinic acid-4'-O-glucuronide	Phenolic acids	301733	34806	16937.7
pme2828	C6H5NO3	2-Nitrophenol	Phenolic acids	4.15403e+06	4053500	4390700
Hmgn001653	C7H6O3	Salicylic acid	Phenolic acids	123563	986450	44680
mws0749	C7H6O3	Salicylic acid	Phenolic acids	140190	913563	59276
mws0628	C7H6O2	2-Hydroxybenzaldehyde (Salicylaldehyde)	Phenolic acids	426240	310283	27974
HJN102	C34H30O15	3,4,5-Tricaffeoylquinic acid	Phenolic acids	16222	34250.7	37019.7
mws0639	C7H6O4	2,5-Dihydroxybenzoic acid; Gentisic Acid*	Phenolic acids	1568900	2.16817e+07	718777
ML10179289	C8H10O	2-Phenylethanol	Phenolic acids	28151.7	66131	568223
MA10040889	C6H5NO4	4-Nitrocatechol	Phenolic acids	4441.7	100816	3309.9
Hmtn001120	C14H20O8	5-(2-Hydroxyethyl)-2-O-glucosylphenol	Phenolic acids	1505100	4.04727e+07	3462900
pmb0751	C16H16O7	Trans-5-O-(p-Coumaroyl)shikimate	Phenolic acids	690840	262770	30502.3
Lmln001195	C14H18O7	Picein (4-Acetylphenyl-glucoside)	Phenolic acids	81034.7	21259.7	8845.53
Zmjp000624	C8H9NO3	2-Amino-3-methoxybenzoic acid	Phenolic acids	26489	18632.7	11401.8
pmn001710	C24H26O13	Rosmarinic acid-3'-O-glucoside	Phenolic acids	102959	250863	41207.7
pmn001421	C16H18O8	5-O-p-Coumaroylquinic acid*	Phenolic acids	3.78317e+07	164231	329840
Lmxp001668	C9H10O2	2-Methoxy-4-ethenylphenol	Phenolic acids	34143	121673	26160.7
Lmtn003441	C15H20O7	2-Acetyl-3-hydroxyphenyl-1-O-glucoside	Phenolic acids	3880.4	18187	25917.3
Lmbn001930	C7H6O2	2-Hydroxybenzaldehyde (Salicylaldehyde)	Phenolic acids	8012.43	36016.3	9558.27
mws0906	C16H22O8	Coniferin	Phenolic acids	461570	2.05037e+06	492697
pmn001517	C15H22O8	3,4,5-Trimethoxyphenyl-1-O-Glucoside	Phenolic acids	1.65027e+06	2.07963e+07	2.04333e+07
pmn001518	C13H16O10	2-O-Galloyl-glucose	Phenolic acids	4501000	4.51673e+06	912500
Lmbn002648	C9H8O3	Caffeic aldehyde	Phenolic acids	195497	157810	45508
mws1179	C21H22O10	6-O-Caffeoylarbutin	Phenolic acids	1231700	381137	62585.3
pmb2871	C13H16O9	Protocatechuic acid-4-O-glucoside*	Phenolic acids	14842000	3.64997e+07	1.45387e+07
mws0093	C10H12O3	Coniferyl alcohol	Phenolic acids	17395.3	343880	121613
pmn001690	C16H24O7	3-Hydroxy-4-isopropylbenzylalcohol-3-O-glucoside	Phenolic acids	39794	197227	142103
Zmhn001926	C13H16O8	4-O-Glucosyl-4-hydroxybenzoic acid	Phenolic acids	2201400	1.49213e+06	53195
pmn001681	C10H14O2	1-(4-Methoxyphenyl)-1-propanol	Phenolic acids	7417.37	7059.93	6436
pmb2654	C19H27NO12	Anthranilate-1-O-Sophoroside	Phenolic acids	326857	25830	255123
pme1292	C8H8O4	Vanillic acid	Phenolic acids	128503	16948	18587.3
pme3472	C12H16O7	Arbutin	Phenolic acids	115497	118007	32083.3
Lmtn000940	C14H18O10	1-O-(3,4-Dihydroxy-5-methoxy-benzoyl)-glucoside	Phenolic acids	38632.7	447560	23121.7
pme2268	C7H7NO2	Anthranilic Acid	Phenolic acids	526943	1677900	2.15063e+06
Lmln010063	C14H22O	2,6-Di-tert-butylphenol	Phenolic acids	1.36063e+06	1368600	821673
Lmxp011770	C16H22O4	Diisobutyl phthalate*	Phenolic acids	2.40767e+07	31120000	1.38933e+07
pmb0108	C19H18O8	Feruloyl syringic acid	Phenolic acids	76274	76505	54534.7
Lmmn001643	C9H8O3	Caffeic aldehyde	Phenolic acids	387377	286560	139857
Cmzn005251	C21H22O10	6-O-Caffeoylarbutin	Phenolic acids	306613	187220	71568.3
mws2105	C14H12O3	Benzyl salicylate	Phenolic acids	24034.3	35131	13539
mws1015	C15H16O9	Sinapoyl malate	Phenolic acids	154023	155600	9954.1
pmb2795	C10H10O3	Coniferaldehyde	Phenolic acids	82587.3	113333	1861.37
mws0178	C16H18O9	Cryptochlorogenic acid	Phenolic acids	2.33647e+07	62786.7	19059.7
mws0179	C17H20O9	Chlorogenic acid methyl ester	Phenolic acids	37642.3	29522.7	13420
Lmbn001981	C7H6O3	Salicylic acid	Phenolic acids	125690	894363	35788
mws0180	C7H6O4	2,5-Dihydroxybenzoic acid; Gentisic Acid*	Phenolic acids	936700	1.24543e+07	458127
Lmmn000774	C15H20O9	Dihydrocaffeoylglucose	Phenolic acids	34516.7	186947	76661.7
mws0183	C7H6O4	2,5-Dihydroxybenzoic acid; Gentisic Acid*	Phenolic acids	2055400	29044000	1.10157e+06
Lmdp003146	C10H14O2	1-(4-Methoxyphenyl)-1-propanol	Phenolic acids	591377	772640	449873
mws2368	C8H10O2	Tyrosol	Phenolic acids	4810	43634.7	12993
pmn001367	C13H16O9	Protocatechuic acid-4-O-glucoside*	Phenolic acids	1.36043e+07	3.11267e+07	1.07657e+07
Lmbn002862	C7H6O3	Salicylic acid	Phenolic acids	805427	258833	119027
Hmbp001276	C8H8O4	Vanillic acid	Phenolic acids	131250	1914500	1.77383e+06
Hmtp000776	C8H9NO3	2-Amino-3-methoxybenzoic acid	Phenolic acids	42316.3	13126.7	23589.3
Lmfp006902	C19H24O3	Centrolobol	Phenolic acids	3841.13	42180.7	10903
Zmhn000892	C13H18O8	4-O-Glucosyl-3,4-dihydroxybenzyl alcohol	Phenolic acids	115513	220273	85967.7
Lmmp002068	C45H38O19	Gallocatechin-catechin-catechin	Tannins	21446.3	513143	888953
pme0434	C30H26O12	Procyanidin B4	Tannins	82864	1.41767e+06	1.40733e+06
pme0436	C30H26O12	Procyanidin B4	Tannins	173250	1.02142e+07	1.18273e+07
Lmpp003930	C30H26O12	Procyanidin B4	Tannins	156730	133100	67230.3
mws0836	C30H26O12	Procyanidin B4	Tannins	126757	7.12093e+06	1.29777e+07
pmn001667	C30H26O12	Procyanidin B4	Tannins	46768.3	2.54997e+06	3.11653e+06
Lmmp001653	C45H38O20	Gallocatechin-gallocatechin-catechin	Tannins	75253.3	576020	1.09277e+06
Lmmp001550	C45H38O21	Gallocatechin-gallocatechin-gallocatechin	Tannins	742517	1.25197e+06	582217
Lmhn011886	C30H44O4	Kadsuracoccinic acid A	Terpenoids	32884.7	32468	73088.3
Xmhn006851	C30H40O9	Kadcoccilactone F	Terpenoids	12558.3	62627.3	3.19317e+07
mws1574	C16H22O10	Geniposidic acid	Terpenoids	48957.3	231343	52811.7
Lmhn010561	C30H44O6	Kadcoccinic acid A	Terpenoids	146590	228933	247103
Lmhn010446	C30H44O6	Kadcoccinic acid A	Terpenoids	59736.3	103008	100015
Lmhn011793	C32H48O5	Kadcoccinone A	Terpenoids	2351.3	750.87	2582.27
Lmzn006829	C30H46O3	3-Ketoursolic acid*	Terpenoids	9194.23	5990.03	11966
Lmhn011440	C32H48O6	Kadcoccinone C	Terpenoids	4798.87	1819.17	8146.2
Lmhp010940	C30H44O5	Kadcotrione C	Terpenoids	5.21943e+06	2095100	2.29623e+06
Lmhn011584	C30H44O4	Kadsuracoccinic acid A	Terpenoids	115757	65637.3	121232
mws1430	C30H48O	Lupenone	Terpenoids	34918.7	31116	35923.7
Lmhn011477	C30H46O5	Kadcoccilactone R	Terpenoids	748167	439357	833110
Xmhn008802	C30H38O7	Kadcoccilactone N	Terpenoids	1.99447e+06	1.33367e+06	3.71087e+06
Lmsp013456	C30H46O3	3-Ketoursolic acid*	Terpenoids	102322	77299.3	113654
mws1610	C30H48O4	2α-Hydroxyursolic acid	Terpenoids	95387.3	49441.7	80946.7
Xmhn008190	C30H46O5	Kadcoccilactone R	Terpenoids	712427	440803	747853
Lmhn011379	C30H42O5	Kadcoccilactone Q	Terpenoids	4870.4	3690.33	4760.9
Lmsp013116	C20H32O3	Ent-16α,17-Dihydroxykauran-2-one	Terpenoids	130957	52833	4067.4
Lmsp013238	C30H46O3	3-Ketoursolic acid*	Terpenoids	172753	90500.7	137750
Lmhn011281	C30H44O5	Kadcotrione C	Terpenoids	1.52853e+06	634660	1.69823e+06
Lmhn011282	C30H44O6	Kadcoccinic acid A	Terpenoids	349657	302620	348877
Lmhp013004	C30H46O3	3-Ketoursolic acid*	Terpenoids	1379500	1016270	2075800
pmn001706	C30H48O4	2α-Hydroxyursolic acid	Terpenoids	90794.7	57817.7	96612.3
Lmdn003699	C24H30O12	6-O-Trans-Caffeoyl Ajugol	Terpenoids	2138100	284420	13912.9
Lmhn011098	C30H44O5	Kadcotrione C	Terpenoids	110053	71511.3	601297
Lmhp012369	C30H44O3	Kadcoccinic acid D	Terpenoids	11232000	6.65023e+06	8835300
Hmgp005956	C13H18O3	Dehydrovomifoliol	Terpenoids	135650	147233	88879.7
Lmzn006284	C30H48O4	2α-Hydroxyursolic acid	Terpenoids	73287	54852.7	109187
Lmdn004314	C24H30O11	6-O-p-Coumaroylajugol	Terpenoids	53447.7	106147	99752.7
Xmhn007543	C30H42O4	Kadcoccilactone U	Terpenoids	311457	416720	637967
Lmhn011924	C30H44O6	Kadcoccinic acid A	Terpenoids	4502.37	9675.57	3864.37
Xmhn007349	C31H44O10	Kadcoccilactone H	Terpenoids	9882000	2.21723e+06	1.71533e+06
Lmzn206829	C30H46O3	3-Ketoursolic acid*	Terpenoids	8147.23	6609.7	13390.2
Lmzn006795	C30H46O3	3-Ketoursolic acid*	Terpenoids	9756.03	6497.37	14122.3
Zmgn000173	C5H10O5	D-Ribose	Others	53346.3	15294	Absent
mws1297	C13H18O6	Benzyl glucoside	Phenolic acids	9439.73	7622.4	Absent
HJN083	C26H34O11	Isolariciresinol-9-O-glucoside	Lignans and Coumarins	1.82803e+06	559880	Absent
mws0444	C7H7NO3	4-Aminosalicylic acid	Phenolic acids	68938	73261.3	Absent
mws0124	C13H14N2O3	N-(3-Indolylacetyl)-L-alanine	Amino acids and derivatives	10030.2	11307.4	Absent
Lmdp003286	C21H20O12	6-Hydroxykaempferol-7-O-glucoside	Flavonoids	3767100	136067	Absent
mws2108	C16H18O9	Cryptochlorogenic acid	Phenolic acids	293833	53097.3	Absent
pmb3045	C23H22O13	Tricin-7-O-Glucuronide	Flavonoids	246127	8853.63	Absent
Lmsp005625	C22H18O13	3-O-Methylellagic acid-4'-O-(5''-O-acetyl)arabinoside	Tannins	35098	11219.8	Absent
pmb0490	C13H18N2O2	p-Coumaroylputrescine	Alkaloids	24160	95663.3	Absent
Lmhn001477	C13H12O9	2-Caffeoyl-L-tartaric acid (Caftaric acid)	Phenolic acids	147550	99669.7	Absent
Cmbn007148	C22H22O9	1-O-Feruloyl-3-O-caffeoylglycerol	Lipids	656147	214913	Absent
Zmyn004548	C18H28O3	12-Oxo-phytodienoic acid	Lipids	10775.7	756.493	Absent
Hmcp002207	C22H22O12	Limocitrin-3-O-arabinoside	Flavonoids	2.59417e+06	417487	Absent
mws0057	C21H22O11	Eriodictyol-7-O-glucoside	Flavonoids	12702	13799.3	Absent
ML10177402	C7H7NO3	4-Aminosalicylic acid	Phenolic acids	32620.7	36427.7	Absent
mws1068	C15H10O6	Kaempferol (3,5,7,4'-Tetrahydroxyflavone)	Flavonoids	538917	7502.43	Absent
mws0011	C17H24O9	Syringin	Phenolic acids	449690	231967	Absent
Hmln002806	C16H16O8	5-O-Caffeoylshikimic acid	Phenolic acids	117350	53514.7	Absent
Cmsn002067	C25H32O10	(7S,8R-Threo-3',4,9'-trihydroxy-3-methoxy-4',7-epoxy-neolignan-9-O-rhamnoside	Lignans and Coumarins	319507	15571.7	Absent
HJN086	C21H22O11	Eriodictyol-7-O-glucoside	Flavonoids	371767	54190.3	Absent
pme2529	C6H12O5	1,5-Anhydro-D-glucitol	Others	15438	24060	Absent
pmn001375	C26H32O12	1-Hydroxypinoresinol-1-O-Glucoside	Lignans and Coumarins	104603	199197	Absent
Cmsn002383	C25H34O11	(7S,8S-Threo-3',4,7,9-tetrahydroxy-3-methoxy-8-O-4'-neolignan-9'-O-rhamnoside	Lignans and Coumarins	2.62877e+06	292310	Absent
Zmpn000638	C4H9N3O2	3-Guanidinopropionic acid	Organic acids	9184.9	42313	Absent
Lnrp102163	C33H40O20	Kaempferol-3-O-neohesperidoside-7-O-glucoside	Flavonoids	999833	263317	Absent
Xmgn006542	C10H10O4	Dimethyl Phthalate	Phenolic acids	2610.67	3950.1	Absent
Hmjp002337	C10H8O4	Isoscopoletin (6-Hydroxy-7-Methoxycoumarin)	Lignans and Coumarins	83405	50098.3	Absent
Lmmn003020	C22H28O8	Lyoniresinol	Lignans and Coumarins	71839.3	132150	Absent
pmb0885	C18H26O3	4-Oxo-9Z,11Z,13E,15E-Octadecatetraenoic Acid	Lipids	7501.03	3393.67	Absent
pme0295	C6H11NO3	4-Acetamidobutyric acid	Organic acids	127520	18922.7	Absent
mws1195	C10H10O3	Coniferaldehyde	Phenolic acids	77633.3	137597	Absent
Lmmp002334	C33H40O21	6-Hydroxykaempferol-3-O-rutin-6-O-glucoside	Flavonoids	284107	20835.7	Absent
Hmcp001589	C34H42O21	Isorhamnetin-3-O-rutinoside-4'-O-glucoside	Flavonoids	56226	11666.1	Absent
pme2954	C15H10O7	Quercetin	Flavonoids	2171000	184350	Absent
pmb0197	C11H15N5O5	N7-Methylguanosine	Nucleotides and derivatives	33137	9471.13	Absent
pmn001686	C16H32O4	10,16-Dihydroxypalmitic acid	Lipids	11429	5531.43	Absent
Lmqp000873	C4H4O3	Succinic anhydride	Organic acids	107897	111507	Absent
pme0085	C18H16O8	Rosmarinic acid	Phenolic acids	135003	498560	Absent
Zmhn002227	C17H22O10	4-O-Glucosyl-sinapate	Phenolic acids	130260	21026.3	Absent
Lmhn002140	C14H14O9	Feruloyltartaric acid (Fertaric acid)	Phenolic acids	1845100	672947	Absent
Zmtn001464	C10H7NO4	4,8-Dihydroxyquinoline-2-carboxylic acid	Organic acids	164290	28190	Absent
Lmmp002529	C33H40O21	6-Hydroxykaempferol-3-O-rutin-6-O-glucoside	Flavonoids	126400	9254.63	Absent
Hmtn001288	C9H10O4	Syringaldehyde; 4-Hydroxy-3,5-Dimethoxybenzaldehyde	Phenolic acids	1224300	7602.4	Absent
Zmhn002508	C21H28O12	4-p-Cumaroyl-rhamnosyl-(1→6)-D-glucose	Phenolic acids	117974	102407	Absent
Lmrn001951	C9H10O4	Syringaldehyde; 4-Hydroxy-3,5-Dimethoxybenzaldehyde	Phenolic acids	1.29027e+06	12230.7	Absent
Lmpn006208	C22H22O11	8-Methoxykaempferol-7-O-rhamnoside	Flavonoids	126780	596617	Absent
Lmbn002739	C9H8O3	Caffeic aldehyde	Phenolic acids	121570	26572	Absent
pmb0142	C9H8O3	Caffeic aldehyde	Phenolic acids	97413	27205	Absent
Lmbp002309	C17H22O9	Sinapaldehyde-4-O-Glucoside	Phenolic acids	20241.3	43705.7	Absent
Hmgn001278	C20H30O12	Verbasoside	Phenolic acids	3693.97	151060	Absent
Lmhn002573	C17H20O11	Sinapoylglucuronic acid	Phenolic acids	34990.3	73355	Absent
Hmtp000779	C14H19NO8	Lithospermoside	Alkaloids	44285	14034.3	Absent
Lmbn000193	C3H4O4	Tartronate semialdehyde	Organic acids	7824.7	29928	Absent
Lmdn001560	C15H22O9	6-DeoxyCatalpol	Terpenoids	24279.7	29083	Absent
pme0500	C18H32O16	D-Melezitose	Others	206233	Absent	38072.3
Lmhp010908	C27H54NO7P	LysoPC 19:1	Lipids	27773.7	Absent	67617.7
mws0437	C5H12O5	Xylitol	Others	106383	Absent	13923
Lmrj002087	C10H18N2O5	L-Isoleucyl-L-Aspartate	Amino acids and derivatives	9154.73	Absent	10964.8
pmb0824	C25H28O13	Syringic acid-4-O-(6''-feruloyl)glucoside	Phenolic acids	9198.6	Absent	10065.9
mws4176	C12H16N2O3	L-Alanyl-L-Phenylalanine	Amino acids and derivatives	3188.1	Absent	13505.3
HJAP148	C26H28O15	Kaempferol-3-O-sambubioside	Flavonoids	276357	Absent	113687
mws1078	C7H7NO2	Anthranilic Acid	Phenolic acids	18845.7	Absent	22869
pma3724	C17H20O9	Chlorogenic acid methyl ester	Phenolic acids	45074.3	Absent	4539.1
Lmtp006213	C17H20O4	3'-Hydroxy-3,4,5-trimethoxybibenzyl	Phenolic acids	20026	Absent	32486.7
Lmhp008440	C20H40NO7P	LysoPE 15:1	Lipids	1392.49	Absent	19381.3
pma0134	C4H8O4	D-(-)-Threose	Others	Absent	32288.3	34082.3
pme1086	C10H17N3O6S	Glutathione reduced form	Amino acids and derivatives	Absent	57147.7	322127
mws0001	C4H8N2O3	3-Ureidopropionic Acid	Organic acids	Absent	97982.7	74270.7
mws1375	C12H21N3O6	Nicotianamine	Amino acids and derivatives	Absent	16180	9199.1
HJN074	C31H28O12	Procyanidin A6	Tannins	Absent	55637.7	4719.4
Hmln002355	C27H34O12	5'-Methoxymatairesinoside	Lignans and Coumarins	Absent	54682	222817
pmp000954	C22H30O6	Kadangustin H	Lignans and Coumarins	Absent	3914.37	3.45153e+06
HJAP127	C33H40O20	Quercetin-3-O-(2''-O-Rhamnosyl)rutinoside	Flavonoids	Absent	10367.1	163067
HJAP128	C34H42O20	Isorhamnetin-3-O-rutinoside-7-O-rhamnoside	Flavonoids	Absent	84587.3	1.16923e+06
Lmhp008742	C28H48NO7P	LysoPC 20:5	Lipids	Absent	2334.03	20311.7
pme0266	C10H18O4	Sebacate	Organic acids	Absent	3843.37	2779.37
Xmhn007139	C29H40O7	Kadcoccilactone E	Terpenoids	Absent	2781.53	3092400
pmb2620	C11H12O4	3,4-Dimethoxycinnamic acid	Phenolic acids	Absent	1421.83	16169
pmb2826	C5H8O5	3-Methylmalic acid*	Organic acids	Absent	43480	58610.7
pmb0962	C10H22N2O4	L-Lysine-Butanoic Acid	Amino acids and derivatives	Absent	8362.73	4859.5
Lmyp003951	C11H14O5	3-Hydroxy-1-(4-hydroxy-3,5-dimethoxyphenyl)propan-1-one	Phenolic acids	Absent	194403	6463.07
pme1261	C9H19NO4	D-Panthenol	Others	Absent	1963.47	411.493
pme2598	C8H8O4	Homogentisic acid	Phenolic acids	Absent	55338.3	100588
Lmbp002255	C16H18O10	Fraxetin-8-O-glucoside (Fraxin)	Lignans and Coumarins	Absent	77652.7	8410.67
mws0945	C20H30O3	15-Oxo-5Z,8Z,11Z,13E-eicosatetraenoic acid*	Lipids	Absent	2264.87	3833.27
pmn001646	C45H38O18	Procyanidin C1	Tannins	Absent	150343	273547
pmn001647	C45H38O18	Procyanidin C1	Tannins	Absent	358590	735873
pmb3107	C15H20O10	Glucosyringic Acid	Phenolic acids	Absent	55509.7	9771.2
mws5045	C12H24O3	12-Hydroxydodecanoic acid	Lipids	Absent	6137.83	3182.23
mws0193	C7H15N3O3	L-Homocitrulline	Amino acids and derivatives	Absent	6191.5	14392.3
Lmhp009497	C25H44NO7P	LysoPE 20:4(2n isomer)	Lipids	Absent	4725.1	16865.3
mws0955	C20H30O3	15-Oxo-5Z,8Z,11Z,13E-eicosatetraenoic acid*	Lipids	Absent	2350.1	3825.1
