# Supplementary material for: Extensive Metabolite Profiling in the Unexploited Organs of Black Tiger for Their Potential Valorization in the Pharmaceutical Industry
Source: Life (Basel). 2021 Jun 10;11(6):544. doi: 10.3390/life11060544 (PMC8229443; doi:10.3390/life11060544)
Supplement: Supplementary file 1 [file life-11-00544-s001.zip › Supplementary Table S2.xlsx]

## Sheet: Table S2a
Supplementary Table S2 A: Twenty-one unique metabolites identified in the leaves of Kadsura coccinea Lem
Index	Formula	Compounds	Class	Leaf
Lmtn003032	C14H17NO6	Sambunigrin	Alkaloids	28046
Lmbp003668	C20H18O10	Kaempferol-3-O-arabinoside	Flavonoids	104809
Lmhp002374	C39H50O25	Quercetin-3-O-glucosyl(1→4)rhamnoside-7-O-rutinoside	Flavonoids	123333
Lmdp003509	C20H18O11	Avicularin(Quercetin-3-O-α-L-arabinofuranoside)	Flavonoids	264760
mws0913	C21H20O11	Luteolin-7-O-glucoside (Cynaroside)	Flavonoids	9741400
Hmcp001636	C23H24O13	Limocitrin-7-O-glucoside	Flavonoids	46448.3
pmp001105	C33H40O20	Kaempferol-3-O-neohesperidoside-7-O-glucoside	Flavonoids	21795.7
Cmsp004305	C25H32O10	7S,8R-Threo-3',4,9'-trihydroxy-3-methoxy-4',7-epoxy-neolignan-9-O-rhamnoside	Lignans and Coumarins	140030
Cmsn001914	C25H34O12	7R,8S-erythro-3',4,9,9'-tetrahydroxy-3-methoxy-8-O-4'-neolignan-7-O-glucopyr-anoside	Lignans and Coumarins	2.25407e+06
pmb2786	C18H30O3	13-KODE; (9Z,11E)-13-Oxooctadeca-9,11-dienoic acid*	Lipids	16967.3
Lmrn003000	C9H10O3	2-Hydroxy-3-phenylpropanoic acid	Organic acids	11822.6
Lmbn001676	C6H10O4	2,2-Dimethylsuccinic acid	Organic acids	13364.7
pme0513	C5H12O5	Xylitol	Others	38465.7
Lmzn001582	C18H28O9	5'-Glucosyloxyjasmanic acid	Phenolic acids	47473.7
Lmgn002250	C31H34O17	Dicaffeoylquinic acid-O-glucoside	Phenolic acids	1816200
Lmfn000604	C13H16O10	2-O-Galloyl-glucose	Phenolic acids	2326400
pmb0752	C17H20O9	Chlorogenic acid methyl ester	Phenolic acids	351217
Zmhn003082	C15H18O10	5-O-Galloyl-methyl quinine ester	Phenolic acids	81997.3
Li512113	C20H20O12	Maleoyl-caffeoylquinic acid	Phenolic acids	15909
mws0182	C8H8O3	p-Hydroxyphenyl acetic acid	Phenolic acids	25320
pmp000436	C30H50O	Taraxerol	Terpenoids	82618.7

## Sheet: Table S2b
Supplementary Table S2 B: Thirteen unique metabolites identified in the stems of Kadsura coccinea Lem.
Index	Formula	Compounds	Class	Stem
pmb2228	C27H56NO7P	LysoPC 19:0	Lipids	46755.3
Cmbp005948	C21H20O8	1-O-p-Hydroxycinnamoyl-3-O-caffeoylglycerol	Lipids	26449.3
mws0425	C5H6O4	Methylenesuccinic acid	Organic acids	163850
pme2761	C5H6O6	4-Hydroxy-2-oxoglutaric acid	Organic acids	158580
pme3034	C5H8O4	Ethylmalonic acid	Organic acids	13772.3
Hmfn000531	C6H8O6	D-Glucurono-6,3-lactone	Others	382130
mws0145	C8H8O3	O-Anisic acid (2-Methoxybenzoic acid)	Phenolic acids	68832.3
mws0027	C9H10O5	4-Hydroxy-3-methoxymandelate	Phenolic acids	94813.7
Zmhn002783	C14H14O9	5-O-Galloylshikimic acid	Phenolic acids	48812.7
Lmnn002886	C23H26O11	1'-O-(3,4-Dihydroxyphenethyl)-O-caffeoyl-glucoside	Phenolic acids	214837
mws0853	C11H14O4	Sinapyl alcohol	Phenolic acids	69809
Lmdn003756	C10H10O4	Dimethyl Phthalate	Phenolic acids	96436.7
MA10014775	C6H6O2	Hydroquinone	Phenolic acids	14767
