# Supplementary material for: Extensive Metabolite Profiling in the Unexploited Organs of Black Tiger for Their Potential Valorization in the Pharmaceutical Industry
Source: Life (Basel). 2021 Jun 10;11(6):544. doi: 10.3390/life11060544 (PMC8229443; doi:10.3390/life11060544)
Supplement: Supplementary file 1 [file life-11-00544-s001.zip › Supplementary Table S3.xlsx]

## Sheet: Table S3
Supplementary Table S3: One hundred and eighty-eight differentially accumulated metabolites mutually detected among the three pairwise groups (KL_vs_KR, KL_vs_KS and KS_vs_KR) in Kadsura coccinea Lem
Index	Formula	Compounds	Class	Tissue a				KL_vs_KR				KS_vs_KR				KL_vs_KS
				KL	KS	KR		VIP b	Log2FC c	Type d		VIP b	Log2FC c	Type d		VIP b	Log2FC c	Type d
pmb0774	C10H12N2O	N-Hydroxytryptamine	Alkaloids	661373	2.43857e+06	4.86543e+07		1.08571	6.20096	+		1.09144	4.31846	+		1.09891	1.8825	+
pme2024	C10H12N2O	Serotonin	Alkaloids	700717	2605300	6.19703e+07		1.08549	6.4666	+		1.09171	4.57206	+		1.09814	1.89455	+
pmb0496	C15H22N4O3	N-Feruloylagmatine	Alkaloids	383777	165497	33663.3		1.08231	-3.51102	-		1.07929	-2.29755	-		1.05916	-1.21346	-
pmb0490	C13H18N2O2	p-Coumaroylputrescine	Alkaloids	24160	95663.3	Absent		1.08547	-11.3904	-		1.09214	-13.3758	-		1.08914	1.98535	+
Lmgp000796	C8H7NO2	4-Hydroxymandelonitrile	Alkaloids	17193	148343	359930		1.08294	4.38782	+		1.07546	1.27878	+		1.09773	3.10905	+
Hmtp000779	C14H19NO8	Lithospermoside	Alkaloids	44285	14034.3	Absent		1.08594	-12.2646	-		1.09213	-10.6067	-		1.10151	-1.65786	-
pme0278	C7H14N2O4	2,6-Diaminooimelic acid	Amino acids and derivatives	3153.57	10124.7	42210.7		1.0834	3.74255	+		1.07924	2.05972	+		1.07413	1.68283	+
pme0026	C6H14N2O2	L-Lysine	Amino acids and derivatives	4976.43	21966	70059		1.08464	3.81539	+		1.08726	1.6733	+		1.09836	2.14209	+
pmb2591	C13H14N2O3	N-Acetyl-L-Tryptophan	Amino acids and derivatives	1.44043e+06	77855	229323		1.08219	-2.65105	-		1.08131	1.55852	+		1.10351	-4.20957	-
mws4176	C12H16N2O3	L-Alanyl-L-Phenylalanine	Amino acids and derivatives	3188.1	Absent	13505.3		1.0698	2.08276	+		1.09171	10.5513	+		1.10537	-8.46856	-
mws0254	C6H9N3O2	L-Histidine	Amino acids and derivatives	21779	138453	388497		1.0835	4.15689	+		1.08154	1.4885	+		1.09767	2.66839	+
mws0260	C6H14N4O2	L-Arginine	Amino acids and derivatives	71618	411153	1850500		1.0853	4.69145	+		1.09188	2.17017	+		1.1035	2.52128	+
Zmgn002106	C11H13NO3	N-Acetyl-L-phenylalanine	Amino acids and derivatives	117529	663207	249517		1.0454	1.08612	+		1.05251	-1.41032	-		1.08483	2.49645	+
pme1210	C5H11NO2S	L-Methionine	Amino acids and derivatives	16588.7	141423	343213		1.08161	4.37084	+		1.08579	1.27909	+		1.09706	3.09175	+
pme0137	C7H12N2O4	N-Acetyl-L-Glutamine	Amino acids and derivatives	6.07083e+06	15339000	737800		1.08572	-3.04059	-		1.09195	-4.37783	-		1.10387	1.33724	+
Lmhp001670	C11H22N2O3	L-Valyl-L-Leucine	Amino acids and derivatives	15466.7	61512	176367		1.08448	3.51134	+		1.06968	1.51964	+		1.09069	1.99171	+
mws0219	C4H7NO4	L-Aspartic Acid	Amino acids and derivatives	524910	2.46497e+06	5.08803e+06		1.08569	3.27697	+		1.09168	1.04554	+		1.10511	2.23143	+
pme0193	C5H10N2O3	L-Glutamine	Amino acids and derivatives	284777	1.10214e+06	3615200		1.08556	3.66617	+		1.08465	1.71377	+		1.10097	1.9524	+
pme3382	C6H11NO4	N-Acetyl-L-threonine	Amino acids and derivatives	41357.7	13193	5405.03		1.07474	-2.93578	-		1.03399	-1.2874	-		1.06452	-1.64838	-
pme1086	C10H17N3O6S	Glutathione reduced form	Amino acids and derivatives	Absent	57147.7	322127		1.08599	15.1273	+		1.08914	2.49486	+		1.10562	12.6325	+
mws0520	C11H13NO4	N-Acetyl-L-tyrosine	Amino acids and derivatives	112537	244537	17630.3		1.08223	-2.67426	-		1.09032	-3.79392	-		1.08684	1.11966	+
pmb0468	C6H11NO3S	N-Formyl-L-Methionine	Amino acids and derivatives	991230	3.36583e+06	8.21323e+07		1.08565	6.37259	+		1.09205	4.60891	+		1.10072	1.76367	+
mws0282	C11H12N2O2	L-Tryptophan	Amino acids and derivatives	640427	2035900	6.60643e+06		1.08575	3.36677	+		1.09173	1.6982	+		1.10449	1.66856	+
ML10181668	C6H11NO2	Cycloleucine	Amino acids and derivatives	92433.7	6032700	2.12607e+06		1.08413	4.52362	+		1.08259	-1.50462	-		1.10473	6.02824	+
Zmzn000113	C5H9NO4	L-threo-3-Methylaspartate	Amino acids and derivatives	294180	651817	1413900		1.0848	2.26491	+		1.08507	1.11714	+		1.10071	1.14777	+
pme3033	C4H9NO2	N,N-Dimethylglycine	Amino acids and derivatives	83773.3	259517	650387		1.08533	2.95673	+		1.0902	1.32547	+		1.10411	1.63126	+
mws0193	C7H15N3O3	L-Homocitrulline	Amino acids and derivatives	Absent	6191.5	14392.3		1.08596	10.6431	+		1.00746	1.21694	+		1.10406	9.42615	+
Zmyn000155	C7H14N2O3	N-α-Acetyl-L-ornithine	Amino acids and derivatives	431730	1.39353e+06	7.26747e+06		1.08529	4.07325	+		1.08768	2.38271	+		1.09759	1.69055	+
pme2459	C21H20O11	Luteolin-7-O-glucoside (Cynaroside)	Flavonoids	2.10857e+06	234887	40091.3		1.08145	-5.71683	-		1.06626	-2.5506	-		1.10067	-3.16623	-
Hmcp002207	C22H22O12	Isorhamnetin-7-O-glucoside (Brassicin)	Flavonoids	2.59417e+06	417487	Absent		1.08589	-18.1369	-		1.09193	-15.5014	-		1.09382	-2.63547	-
mws2209	C21H20O11	Kaempferol-3-O-glucoside (Astragalin)	Flavonoids	4.34333e+06	16028.7	7691.87		1.08587	-9.14125	-		1.0769	-1.05925	-		1.10557	-8.082	-
Lmjp002461	C27H30O16	Quercetin-3-O-neohesperidoside	Flavonoids	9.13457e+06	3.15237e+06	141803		1.08529	-6.00937	-		1.09043	-4.47447	-		1.1009	-1.5349	-
pmp001135	C30H26O13	Biondnoid I	Flavonoids	456467	12604	2479.43		1.08514	-7.52436	-		1.08098	-2.3458	-		1.10462	-5.17856	-
Lmjp003044	C22H22O12	Isorhamnetin-3-O-Glucoside	Flavonoids	2.44083e+06	365980	136027		1.08273	-4.16541	-		1.06014	-1.42788	-		1.10121	-2.73754	-
mws2627	C16H12O7	Tamarixetin (3,3',5,7-Tetrahydroxy-4'-Methoxyflavone)	Flavonoids	947750	25170	4582.77		1.08538	-7.69214	-		1.08841	-2.45741	-		1.10509	-5.23473	-
Lmmp002529	C33H40O21	Myricetin--3-O-rutinoside-8-O-rhamnoside	Flavonoids	126400	9254.63	Absent		1.08589	-13.7777	-		1.09175	-10.006	-		1.1016	-3.77168	-
HJAP148	C26H28O15	Kaempferol-3-O-sambubioside	Flavonoids	276357	Absent	113687		1.08383	-1.28147	-		1.09213	13.6248	+		1.10571	-14.9062	-
Lmpn006208	C22H22O11	8-Methoxykaempferol-7-O-rhamnoside	Flavonoids	126780	596617	Absent		1.08586	-13.782	-		1.09207	-16.0165	-		1.09645	2.23448	+
mws1329	C21H20O12	Quercetin-7-O-glucoside	Flavonoids	2.04463e+07	1003170	100559		1.08471	-7.66766	-		1.08249	-3.31846	-		1.10372	-4.3492	-
mws0917	C17H14O7	3,7-Di-O-methylquercetin	Flavonoids	4359.77	15379.3	56646.3		1.0835	3.69966	+		1.08733	1.88099	+		1.09128	1.81867	+
mws1179	C21H22O10	Naringenin-7-O-glucoside (Prunin)	Flavonoids	1231700	381137	62585.3		1.08144	-4.29868	-		1.08096	-2.60641	-		1.10003	-1.69227	-
Lmmp002796	C27H30O17	Myricetin--3-O-rutinoside	Flavonoids	2.13913e+06	840100	48485.3		1.08585	-5.46333	-		1.09132	-4.11494	-		1.09947	-1.34839	-
Lmsn002815	C27H30O15	Kaempferol-3-O-rutinoside(Nicotiflorin)*	Flavonoids	2.72027e+06	222967	20703		1.0849	-7.03776	-		1.08779	-3.42892	-		1.10419	-3.60885	-
pmb3045	C23H22O13	Tricin-7-O-Glucuronide	Flavonoids	246127	8853.63	Absent		1.08594	-14.7391	-		1.09059	-9.94213	-		1.09869	-4.79699	-
mws0091	C21H20O12	Quercetin-3-O-glucoside (Isoquercitrin)	Flavonoids	3.15143e+07	1.60177e+06	133243		1.08427	-7.8858	-		1.08372	-3.58753	-		1.1053	-4.29827	-
HJAP127	C33H40O20	Quercetin-3-O-(2''-O-Rhamnosyl)rutinoside	Flavonoids	Absent	10367.1	163067		1.08587	14.1452	+		1.08761	3.97538	+		1.10528	10.1698	+
HJAP128	C34H42O20	Isorhamnetin-3-O-rutinoside-7-O-rhamnoside	Flavonoids	Absent	84587.3	1.16923e+06		1.08599	16.9872	+		1.08418	3.78898	+		1.10503	13.1982	+
mws1068	C15H10O6	Kaempferol (3,5,7,4'-Tetrahydroxyflavone)	Flavonoids	538917	7502.43	Absent		1.08589	-15.8698	-		1.09206	-9.70322	-		1.10488	-6.16656	-
Xmsn002700	C21H22O12	Taxifolin-3'-O-glucoside	Flavonoids	170217	341830	35033.3		1.03576	-2.28057	-		1.07571	-3.28648	-		1.01062	1.00591	+
HJN086	C21H22O11	Eriodictyol-3'-O-glucoside	Flavonoids	371767	54190.3	Absent		1.08587	-15.3341	-		1.09211	-12.5558	-		1.10114	-2.77829	-
pmp001079	C27H30O15	Luteolin-7-O-neohesperidoside (Lonicerin)*	Flavonoids	3.06627e+06	387340	59273.7		1.08205	-5.69295	-		1.07268	-2.70814	-		1.10375	-2.98481	-
Lmmp002334	C33H40O21	Quercetin-3-O-rutinoside-7-O-glucoside	Flavonoids	284107	20835.7	Absent		1.08598	-14.9461	-		1.09151	-11.1768	-		1.09976	-3.76931	-
pme2954	C15H10O7	Quercetin	Flavonoids	2171000	184350	Absent		1.08592	-17.88	-		1.09091	-14.3222	-		1.08516	-3.55784	-
pmp001309	C21H20O12	6-Hydroxykaempferol-7-O-glucoside	Flavonoids	3.35923e+06	992910	68458.7		1.08533	-5.61676	-		1.09097	-3.85836	-		1.09677	-1.7584	-
Lmjp002867	C27H30O15	Kaempferol-3-O-neohesperidoside	Flavonoids	4.87183e+06	542090	78865		1.0855	-5.94894	-		1.09176	-2.78108	-		1.10405	-3.16786	-
pme1611	C21H22O10	Isohemiphloin	Flavonoids	1.44803e+06	480327	51517.3		1.08421	-4.81289	-		1.08915	-3.22089	-		1.10122	-1.59201	-
Lmyp005280	C37H38O18	Isorhamnetin-3-O-[2'''-O-(6''-p-coumaryl)glucosyl]rhamnoside	Flavonoids	476757	13993.3	1277.59		1.08412	-8.54368	-		1.08024	-3.45324	-		1.10532	-5.09044	-
Lmjp002596	C26H28O16	Quercetin-3-O-sambubioside	Flavonoids	1.24033e+06	111917	28222.7		1.08501	-5.45773	-		1.0794	-1.9875	-		1.10362	-3.47023	-
Lmdp003286	C21H20O12	Isohyperoside	Flavonoids	3767100	136067	Absent		1.08596	-18.6751	-		1.09201	-13.884	-		1.10407	-4.79107	-
pmp000593	C27H30O15	Luteolin-7-O-rutinoside	Flavonoids	2.56007e+06	267887	37208.7		1.08427	-6.1044	-		1.08438	-2.84791	-		1.10402	-3.25649	-
Lmlp005236	C21H22O11	Dihydrokaempferol-3-O-glucoside	Flavonoids	711180	47798.7	11007.1		1.08105	-6.01371	-		1.00113	-2.11854	-		1.08811	-3.89517	-
mws0059	C27H30O16	Quercetin-3-O-rutinoside (Rutin)	Flavonoids	2667200	1.16883e+06	79240.3		1.08207	-5.07295	-		1.0861	-3.88269	-		1.08036	-1.19026	-
mws0856	C21H20O12	Quercetin-4'-O-glucoside (Spiraeoside)*	Flavonoids	2.69947e+07	1.32663e+06	109970		1.08463	-7.93942	-		1.08348	-3.59258	-		1.1034	-4.34683	-
Lnrp102163	C33H40O20	Quercetin-3-O-rutinoside-7-O-rhamnoside	Flavonoids	999833	263317	Absent		1.08597	-16.7614	-		1.09207	-14.8365	-		1.09939	-1.92489	-
mws0066	C16H12O7	Isorhamnetin	Flavonoids	4096000	120587	23018.3		1.08546	-7.47529	-		1.08482	-2.38922	-		1.10396	-5.08607	-
Hmcp001589	C34H42O21	Isorhamnetin-3-O-rutinoside-4'-O-glucoside	Flavonoids	56226	11666.1	Absent		1.08595	-12.609	-		1.09162	-10.3401	-		1.09397	-2.26892	-
Hmmn003584	C33H40O19	Luteolin-7-O-rutinoside-5-O-rhamnoside	Flavonoids	1.87417e+07	173887	37983.3		1.08395	-8.94667	-		1.05621	-2.19471	-		1.10521	-6.75196	-
Xmyp004678	C32H38O19	Kaempferol-3-O-(2-O-Xylosyl-6-O-Rhamnosyl)Glucoside	Flavonoids	51739	21405	626080		1.08407	3.59702	+		1.09168	4.87033	+		1.08441	-1.2733	-
pmp000954	C22H30O6	Pregomisin	Lignans and Coumarins	Absent	3914.37	3.45153e+06		1.08598	18.5489	+		1.09011	9.78424	+		1.10305	8.76464	+
Cmsn002067	C25H32O10	7S,8R-threo-3',9,9'-trihydroxy-3-methoxy-4',7-epoxy-neolignan-4-O-rhamnoside	Lignans and Coumarins	319507	15571.7	Absent		1.08593	-15.1156	-		1.09127	-10.7567	-		1.09998	-4.35885	-
pmp000940	C23H28O7	Schisandrol B	Lignans and Coumarins	7801.83	55910.3	1.13587e+07		1.08563	10.5077	+		1.09204	7.66646	+		1.10081	2.84123	+
Lmhn010327	C21H26O5	Kadsuralignan C	Lignans and Coumarins	4513.8	13372.3	1207940		1.08465	8.06399	+		1.09031	6.49715	+		1.09023	1.56684	+
Lmhn009112	C29H36O10	Kadsuralignan G	Lignans and Coumarins	12413.3	64248.3	3.29777e+07		1.08501	11.3754	+		1.09198	9.00361	+		1.08273	2.37177	+
Lmdn001925	C26H34O12	Olivil-4'-O-glucoside	Lignans and Coumarins	834143	4.99113e+06	162027		1.08552	-2.36406	-		1.09188	-4.94506	-		1.10478	2.581	+
Hmln002355	C27H34O12	5'-Methoxymatairesinoside	Lignans and Coumarins	Absent	54682	222817		1.08597	14.5956	+		1.08336	2.02672	+		1.10552	12.5689	+
HJN083	C26H34O11	Lariciresinol-4'-O-glucoside	Lignans and Coumarins	1.82803e+06	559880	Absent		1.08599	-17.6319	-		1.0921	-15.9248	-		1.10221	-1.7071	-
Lmdn004267	C20H22O6	Epipinoresinol	Lignans and Coumarins	45542.3	458573	128997		1.08384	1.50205	+		1.09048	-1.82982	-		1.10536	3.33187	+
mws0097	C20H22O6	Pinoresinol	Lignans and Coumarins	51795.7	453543	131260		1.08417	1.34152	+		1.0914	-1.78881	-		1.10534	3.13034	+
Lmtn003096	C26H36O11	Secoisolariciresinol 4-O-glucoside	Lignans and Coumarins	572447	1955400	163357		1.08392	-1.80912	-		1.09186	-3.58137	-		1.10462	1.77225	+
pmn001492	C11H8O3	Ayapin	Lignans and Coumarins	22459.7	286703	71734.7		1.02627	1.67533	+		1.09066	-1.99882	-		1.09232	3.67415	+
Cmsn002383	C25H34O11	(7S,8S-Threo-3',4,7,9-tetrahydroxy-3-methoxy-8-O-4'-neolignan-9'-O-rhamnoside	Lignans and Coumarins	2.62877e+06	292310	Absent		1.08599	-18.156	-		1.09214	-14.9872	-		1.10536	-3.16882	-
pmn001378	C26H32O11	Pinoresinol-4-O-glucoside	Lignans and Coumarins	453530	129270	22216.7		1.07919	-4.35148	-		1.06887	-2.54067	-		1.09558	-1.81081	-
Lmbp002255	C16H18O10	Fraxetin-8-O-glucoside (Fraxin)	Lignans and Coumarins	Absent	77652.7	8410.67		1.08469	9.86808	+		1.0789	-3.20674	-		1.10565	13.0748	+
Hmlp003129	C20H22O6	Matairesinol	Lignans and Coumarins	8665.23	237723	93848.3		1.08508	3.43702	+		1.09135	-1.34088	-		1.10522	4.7779	+
mws0120	C8H20NO6P	Choline Alfoscerate	Lipids	81368.3	195023	37526.7		1.06676	-1.11655	-		1.0879	-2.37766	-		1.08938	1.26111	+
mws0367	C18H30O2	α-Linolenic Acid	Lipids	8.39547e+06	984610	302867		1.08528	-4.79286	-		1.0841	-1.70087	-		1.10495	-3.09199	-
mws0366	C18H30O2	γ-Linolenic Acid	Lipids	9.01943e+06	1.20827e+06	367593		1.08471	-4.61685	-		1.08135	-1.71676	-		1.10459	-2.9001	-
Lmhp011388	C21H36O4	2-α-Linolenoyl-glycerol	Lipids	350750	31662	6491.93		1.08386	-5.75565	-		1.07732	-2.28603	-		1.10437	-3.46962	-
Lmhp010040	C25H46NO7P	LysoPE 20:3	Lipids	9471.23	4283.23	20408		1.05984	1.10751	+		1.08351	2.25236	+		1.05112	-1.14485	-
pmp001281	C26H52NO7P	LysoPC 18:1	Lipids	9516000	1.14587e+06	3.17523e+06		1.07905	-1.58349	-		1.08613	1.47042	+		1.10469	-3.05392	-
Cmbn007148	C22H22O9	1-O-Feruloyl-3-O-caffeoylglycerol	Lipids	656147	214913	Absent		1.08599	-16.1537	-		1.09213	-14.5435	-		1.10441	-1.61026	-
Lmhp008742	C28H48NO7P	LysoPC 20:5	Lipids	Absent	2334.03	20311.7		1.08587	11.1401	+		1.08623	3.12141	+		1.10508	8.01868	+
Hmqp006235	C26H46NO7P	LysoPC 18:4	Lipids	23273.7	2579.8	8994.9		1.07341	-1.37152	-		1.07892	1.80185	+		1.09993	-3.17337	-
pmb0885	C18H26O3	4-Oxo-9Z,11Z,13E,15E-Octadecatetraenoic Acid	Lipids	7501.03	3393.67	Absent		1.08595	-9.70295	-		1.09116	-8.5587	-		1.05368	-1.14424	-
Lmhp011562	C21H36O4	1-α-Linolenoyl-glycerol	Lipids	85111.3	37524.7	11409.7		1.08142	-2.89909	-		1.0835	-1.71758	-		1.07774	-1.18151	-
Lmhp009497	C25H44NO7P	LysoPE 20:4	Lipids	Absent	4725.1	16865.3		1.08596	10.8718	+		1.08796	1.83564	+		1.10557	9.0362	+
Lmbn005287	C18H32O4	7S,8S-DiHODE; (9Z,12Z)-(7S,8S)-Dihydroxyoctadeca-9,12-dienoic acid	Lipids	7515.6	311033	78759.3		1.08291	3.38949	+		1.09164	-1.98155	-		1.10436	5.37104	+
Lmbn003970	C18H34O5	9,12,13-TriHOME; 9(S),12(S),13(S)-Trihydroxy-10(E)-octadecenoic acid	Lipids	331163	2556800	1.14587e+06		1.08522	1.79082	+		1.09038	-1.1579	-		1.10528	2.94872	+
Lmhp010908	C27H54NO7P	LysoPC 19:1	Lipids	27773.7	Absent	67617.7		1.07754	1.28368	+		1.09213	12.8752	+		1.10559	-11.5915	-
pmn001694	C18H34O5	9,10,13-Trihydroxy-11-Octadecenoic Acid	Lipids	201253	1.60233e+06	703117		1.08563	1.80475	+		1.08746	-1.18834	-		1.10501	2.99309	+
pmn001686	C16H32O4	10,16-Dihydroxypalmitic acid	Lipids	11429	5531.43	Absent		1.08596	-10.3105	-		1.09179	-9.26351	-		1.07661	-1.04697	-
Lmbn005923	C18H30O2	Crepenynic acid	Lipids	167833	21711	6364.7		1.08485	-4.72079	-		1.08416	-1.77026	-		1.10568	-2.95053	-
Zmyn004548	C18H28O3	12-Oxo-phytodienoic acid	Lipids	10775.7	756.493	Absent		1.08566	-10.2256	-		1.09078	-6.39326	-		1.09979	-3.83231	-
Lmhp009526	C27H46O9	2-α-Linolenoyl-glycerol-1-O-glucoside	Lipids	328233	26945	5400.53		1.08388	-5.92548	-		1.08139	-2.31884	-		1.10374	-3.60663	-
Lmhp009890	C28H52NO7P	LysoPC 20:3	Lipids	22385	5851.77	46621.7		1.06482	1.05847	+		1.09099	2.99406	+		1.09823	-1.93559	-
Lmhp010190	C26H52NO7P	LysoPC 18:1(2n isomer)	Lipids	9.51327e+06	1118200	3.21887e+06		1.07976	-1.56339	-		1.08552	1.52537	+		1.10455	-3.08876	-
Lmhp008440	C20H40NO7P	LysoPE 15:1	Lipids	1392.49	Absent	19381.3		1.05768	3.79893	+		1.09212	11.0725	+		1.09681	-7.27352	-
Lmhp009773	C27H46O9	1-α-Linolenoyl-glycerol-3-O-glucoside	Lipids	308707	23407.3	4761.27		1.07957	-6.01875	-		1.04887	-2.29754	-		1.10389	-3.7212	-
Zmpn003368	C18H30O3	13S-Hydroxy-9Z,11E,15Z-octadecatrienoic acid	Lipids	521140	27074.3	13067.3		1.08565	-5.31763	-		1.07972	-1.05096	-		1.10539	-4.26667	-
pme1474	C11H15N5O3S	5'-Deoxy-5'-(methylthio)adenosine	Nucleotides and derivatives	253827	526920	1346900		1.08293	2.40773	+		1.09048	1.35399	+		1.08892	1.05374	+
pmb0197	C11H15N5O5	N7-Methylguanosine	Nucleotides and derivatives	33137	9471.13	Absent		1.0856	-11.8462	-		1.09142	-10.0394	-		1.06854	-1.80683	-
mws0668	C10H12N4O6	Xanthosine	Nucleotides and derivatives	52846	688040	149080		1.0544	1.49622	+		1.08377	-2.20641	-		1.09732	3.70263	+
pmc0066	C10H13N4O7P	2'-Deoxyinosine-5'-monophosphate	Nucleotides and derivatives	292203	1.55867e+06	119367		1.08403	-1.29157	-		1.08842	-3.70684	-		1.09615	2.41527	+
Lmqp000329	C8H14N3O7P	5-Aminoimidazole ribonucleotide	Nucleotides and derivatives	217493	53161	15558.7		1.08116	-3.80518	-		1.06968	-1.77265	-		1.10437	-2.03253	-
Lmbn001288	C5H8O4	2-Hydroxy-2-methyl-3-oxobutanoic acid*	Organic acids	70115.7	29645.7	12705.3		1.07499	-2.46431	-		1.04971	-1.22239	-		1.09857	-1.24192	-
Lmbn000193	C3H4O4	Tartronate semialdehyde	Organic acids	7824.7	29928	Absent		1.08587	-9.76389	-		1.09174	-11.6993	-		1.08834	1.93539	+
Lmbn001467	C7H13NO3	5-Acetamidopentanoic Acid	Organic acids	13390.3	79034	29960.3		1.0187	1.16186	+		1.08857	-1.39942	-		1.09063	2.56128	+
pme0295	C6H11NO3	4-Acetamidobutyric acid	Organic acids	127520	18922.7	Absent		1.08591	-13.7904	-		1.09209	-11.0379	-		1.10258	-2.75254	-
mws0237	C9H16O4	Azelaic acid	Organic acids	595687	6.25417e+06	1.89873e+06		1.08046	1.67241	+		1.09181	-1.71978	-		1.10441	3.39219	+
Lmmn000806	C5H8O4	Dimethylmalonic acid	Organic acids	71249.3	32289	11603.7		1.07971	-2.61829	-		1.06578	-1.47646	-		1.08291	-1.14183	-
Lmbn001364	C5H8O4	4-Hydroxy-2-Oxopentanoic Acid	Organic acids	72818	28199.3	11930		1.07973	-2.6097	-		1.00571	-1.24107	-		1.05391	-1.36863	-
pme3011	C4H9NO2	γ-Aminobutyric acid	Organic acids	61506.7	337167	1.04323e+06		1.0858	4.08418	+		1.09176	1.62953	+		1.10501	2.45465	+
Lmmn003323	C16H32O3	2-Hydroxyhexadecanoic acid	Organic acids	140030	861800	412147		1.08425	1.55742	+		1.08662	-1.0642	-		1.10544	2.62162	+
Zmpn000638	C4H9N3O2	3-Guanidinopropionic acid	Organic acids	9184.9	42313	Absent		1.08589	-9.99512	-		1.09213	-12.1989	-		1.10325	2.20377	+
Lmbn002862	C7H6O3	3-Hydroxybenzoic Acid	Organic acids	805427	258833	119027		1.08578	-2.75847	-		1.08525	-1.12074	-		1.10198	-1.63773	-
Zmtn001464	C10H7NO4	4,8-Dihydroxyquinoline-2-carboxylic acid	Organic acids	164290	28190	Absent		1.08599	-14.156	-		1.09201	-11.613	-		1.10272	-2.54299	-
mws0639	C7H6O4	2,3-Dihydroxybenzoic Acid	Organic acids	1568900	2.16817e+07	718777		1.08394	-1.12614	-		1.09194	-4.91479	-		1.10527	3.78865	+
pmp000939	C22H24O8	Plaunol E	Others	9429.97	75874.3	1.58933e+07		1.0859	10.7189	+		1.0914	7.71059	+		1.09967	3.00829	+
mws1589	C18H32O16	D-Panose	Others	951810	72255	225897		1.0671	-2.07501	-		1.06853	1.64449	+		1.09725	-3.7195	-
mws5038	C12H22O11	Isomaltulose*	Others	2.95233e+06	420727	987567		1.0453	-1.57991	-		1.04671	1.23099	+		1.08858	-2.8109	-
HJN012	C20H26O7	4,7,9,9'-Tetrahydroxy-3,3'-dimethoxy-8-O-4'-neolignan	Others	89369.3	826490	373243		1.06912	2.06226	+		1.08671	-1.14688	-		1.09888	3.20915	+
Zmgn000173	C5H10O5	D-Ribose	Others	53346.3	15294	Absent		1.08579	-12.5332	-		1.09188	-10.7308	-		1.0864	-1.80242	-
pme0500	C18H32O16	D-Melezitose	Others	206233	Absent	38072.3		1.07097	-2.43746	-		1.09152	12.0465	+		1.1057	-14.484	-
pme1261	C9H19NO4	D-Panthenol	Others	Absent	1963.47	411.493		1.08341	5.5148	+		1.05571	-2.25446	-		1.10384	7.76926	+
pme2596	C8H9NO4	4-Pyridoxic acid	Others	275553	132720	33388		1.08422	-3.04493	-		1.08808	-1.99098	-		1.1022	-1.05395	-
mws0232	C17H20N4O6	Riboflavin (Vitamin B2)	Others	521790	94215.7	46214		1.08174	-3.49707	-		1.04784	-1.02764	-		1.10511	-2.46943	-
mws0437	C5H12O5	D-Arabitol	Others	106383	Absent	13923		1.07095	-2.93372	-		1.09128	10.5953	+		1.10547	-13.529	-
Lmhn002926	C13H12O7	p-Coumaroylmalic acid	Phenolic acids	2027100	233263	9074.1		1.08264	-7.80345	-		1.08417	-4.68406	-		1.10245	-3.11939	-
ML10179289	C8H10O	2-Phenylethanol	Phenolic acids	28151.7	66131	568223		1.0849	4.33517	+		1.09045	3.10306	+		1.0813	1.23211	+
Hmtn001120	C14H20O8	5-(2-Hydroxyethyl)-2-O-glucosylphenol	Phenolic acids	1505100	4.04727e+07	3462900		1.08428	1.20212	+		1.0917	-3.5469	-		1.10556	4.74902	+
Lmgn001670	C7H6O3	Salicylic acid	Phenolic acids	10222.6	522427	186110		1.07969	4.18633	+		1.08781	-1.48907	-		1.10193	5.6754	+
Lmyp003951	C11H14O5	3-Hydroxy-1-(4-hydroxy-3,5-dimethoxyphenyl)propan-1-one	Phenolic acids	Absent	194403	6463.07		1.08508	9.48808	+		1.0883	-4.91069	-		1.10568	14.3988	+
mws1350	C9H10O4	Syringaldehyde; 4-Hydroxy-3,5-Dimethoxybenzaldehyde	Phenolic acids	62001.3	318113	28826.7		1.04001	-1.1049	-		1.08735	-3.46406	-		1.10431	2.35917	+
mws0024	C7H6O5	Gallic acid	Phenolic acids	784500	5.62053e+06	206377		1.08147	-1.92649	-		1.09129	-4.76736	-		1.10368	2.84086	+
mws0028	C8H8O4	Vanillic acid	Phenolic acids	12133	679987	156180		1.08035	3.6862	+		1.08003	-2.1223	-		1.10505	5.8085	+
pmb3107	C15H20O10	Glucosyringic Acid	Phenolic acids	Absent	55509.7	9771.2		1.08516	10.0844	+		1.07727	-2.50613	-		1.10561	12.5905	+
pmb0751	C16H16O7	Trans-5-O-(p-Coumaroyl)shikimate	Phenolic acids	690840	262770	30502.3		1.08175	-4.50136	-		1.08302	-3.10681	-		1.10109	-1.39455	-
Lmln001195	C14H18O7	Picein (4-Acetylphenyl-glucoside)	Phenolic acids	81034.7	21259.7	8845.53		1.07244	-3.19552	-		1.01978	-1.2651	-		1.09834	-1.93042	-
Lmrn001951	C9H10O4	(S)-2-Hydroxy-3-(4-Hydroxyphenyl)Propanoic Acid	Phenolic acids	1.29027e+06	12230.7	Absent		1.08597	-17.1293	-		1.09207	-10.4083	-		1.10532	-6.72102	-
Lmhn002573	C17H20O11	Sinapoylglucuronic acid	Phenolic acids	34990.3	73355	Absent		1.0857	-11.9247	-		1.09191	-12.9927	-		1.04001	1.06794	+
Hmgn001278	C20H30O12	Verbasoside	Phenolic acids	3693.97	151060	Absent		1.08544	-8.68103	-		1.09211	-14.0348	-		1.10399	5.35381	+
pmb0069	C7H7NO	Benzamide	Phenolic acids	40291	90715.7	894123		1.08542	4.47194	+		1.09079	3.30105	+		1.09257	1.17089	+
Hmln002806	C16H16O8	5-O-Caffeoylshikimic acid	Phenolic acids	117350	53514.7	Absent		1.0857	-13.6705	-		1.09203	-12.5377	-		1.0495	-1.13281	-
Zmjn002583	C8H8O4	2',4',6'-Trihydroxyacetophenone	Phenolic acids	380890	22298.7	10253.8		1.08535	-5.21514	-		1.06121	-1.12079	-		1.10375	-4.09435	-
Zmhn002422	C16H20O9	1-O-Feruloyl-D-Glucose	Phenolic acids	7314000	504817	44066		1.08543	-7.37485	-		1.08906	-3.51802	-		1.10505	-3.85683	-
pme1816	C16H18O9	Neochlorogenic acid(5-O-Caffeoylquinic acid)	Phenolic acids	23661000	64985	22302.7		1.08539	-10.0511	-		1.03932	-1.54289	-		1.10448	-8.50819	-
Zmln000899	C15H20O9	Syringaldehyde-4-O-glucoside	Phenolic acids	272480	84812.3	30276.7		1.08327	-3.16987	-		1.08242	-1.48607	-		1.10194	-1.6838	-
Lmbp002309	C17H22O9	Sinapaldehyde-4-O-Glucoside	Phenolic acids	20241.3	43705.7	Absent		1.08571	-11.1351	-		1.09169	-12.2456	-		1.02948	1.11052	+
Zmdn001863	C18H14O6	2-(7-Dihydroxyl)-benzofuranyl-ferulic acid	Phenolic acids	1.68943e+06	701543	24650.7		1.08572	-6.09877	-		1.09124	-4.83083	-		1.09292	-1.26794	-
Zmhn001358	C13H16O8	4-O-Glucosyl-4-hydroxybenzoic acid	Phenolic acids	182700	443380	55053		1.07779	-1.73058	-		1.09022	-3.00965	-		1.08841	1.27907	+
mws0093	C10H12O3	Coniferyl alcohol	Phenolic acids	17395.3	343880	121613		1.07308	2.80553	+		1.076	-1.4996	-		1.10152	4.30513	+
pmb2620	C11H12O4	3,4-Dimethoxycinnamic acid	Phenolic acids	Absent	1421.83	16169		1.08597	10.811	+		1.0634	3.50741	+		1.09822	7.30361	+
mws0898	C10H12O2	Isoeugenol	Phenolic acids	76106.7	12342.7	202187		1.07733	1.40959	+		1.08959	4.03396	+		1.10115	-2.62437	-
Zmzn002575	C6H5NO3	2-Nitrophenol	Phenolic acids	204440	741413	24849.3		1.07891	-3.0404	-		1.08973	-4.899	-		1.10158	1.8586	+
pmb3074	C16H18O8	5-O-p-Coumaroylquinic acid	Phenolic acids	3.43453e+06	98313.3	17062		1.08359	-7.65318	-		1.04765	-2.5266	-		1.09677	-5.12658	-
Lmtn002565	C14H18O9	1-O-Vanilloyl-D-Glucose	Phenolic acids	2.17153e+06	287553	93051		1.08511	-4.54455	-		1.08536	-1.62774	-		1.1051	-2.91681	-
pme0085	C18H16O8	Rosmarinic acid	Phenolic acids	135003	498560	Absent		1.08548	-13.8727	-		1.09212	-15.7575	-		1.07758	1.88477	+
Zmhn002227	C17H22O10	4-O-Glucosyl-sinapate	Phenolic acids	130260	21026.3	Absent		1.08583	-13.8211	-		1.09123	-11.19	-		1.08564	-2.63112	-
Hmtn001288	C9H10O4	Methyl 2,4-dihydroxyphenylacetate	Phenolic acids	1224300	7602.4	Absent		1.08596	-17.0536	-		1.09119	-9.72231	-		1.1037	-7.33129	-
pma3724	C17H20O9	1-O-Feruloylquinic acid	Phenolic acids	45074.3	Absent	4539.1		1.07994	-3.31183	-		1.09138	8.97827	+		1.10566	-12.2901	-
mws2108	C16H18O9	Cryptochlorogenic acid	Phenolic acids	293833	53097.3	Absent		1.08599	-14.9947	-		1.09193	-12.5264	-		1.10003	-2.46829	-
mws0178	C16H18O9	Chlorogenic acid	Phenolic acids	2.33647e+07	62786.7	19059.7		1.08542	-10.2596	-		1.00341	-1.71994	-		1.10255	-8.53965	-
Hmgn001653	C7H6O3	Protocatechuic aldehyde	Phenolic acids	123563	986450	44680		1.07575	-1.46755	-		1.09118	-4.46454	-		1.1046	2.997	+
Lmbn001981	C7H6O3	2,5-Dihydroxybenzaldehyde	Phenolic acids	125690	894363	35788		1.05059	-1.81232	-		1.08933	-4.64331	-		1.0983	2.83099	+
mws0180	C7H6O4	2,5-Dihydroxybenzoic acid; Gentisic Acid	Phenolic acids	936700	1.24543e+07	458127		1.05915	-1.03184	-		1.09157	-4.76476	-		1.10426	3.73292	+
mws2368	C8H10O2	Tyrosol	Phenolic acids	4810	43634.7	12993		1.03299	1.43363	+		1.05733	-1.74774	-		1.08841	3.18137	+
mws0749	C7H6O3	4-Hydroxybenzoic acid	Phenolic acids	140190	913563	59276		1.02985	-1.24186	-		1.08728	-3.94598	-		1.10268	2.70412	+
Lmhn002140	C14H14O9	Feruloyltartaric acid (Fertaric acid)	Phenolic acids	1845100	672947	Absent		1.08599	-17.6453	-		1.09207	-16.1902	-		1.09621	-1.45513	-
Lmbn002739	C9H8O3	3-Hydroxycinnamic Acid	Phenolic acids	121570	26572	Absent		1.08586	-13.7215	-		1.0918	-11.5277	-		1.09105	-2.19381	-
pmb0142	C9H8O3	Caffeic aldehyde	Phenolic acids	97413	27205	Absent		1.08598	-13.4019	-		1.0921	-11.5617	-		1.10331	-1.84024	-
Lmfp006902	C19H24O3	Centrolobol	Phenolic acids	3841.13	42180.7	10903		1.04046	1.50512	+		1.08576	-1.95186	-		1.09641	3.45698	+
pmn001647	C45H38O18	Procyanidin C2	Tannins	Absent	358590	735873		1.08591	16.3192	+		1.0613	1.03712	+		1.10568	15.2821	+
HJN074	C31H28O12	Procyanidin A6	Tannins	Absent	55637.7	4719.4		1.08582	9.03446	+		1.0906	-3.55939	-		1.10567	12.5938	+
Lmsp005625	C22H18O13	3-O-Methylellagic acid-4'-O-(5''-O-acetyl)arabinoside	Tannins	35098	11219.8	Absent		1.08579	-11.9292	-		1.09191	-10.2838	-		1.08647	-1.64535	-
Xmhn006851	C30H40O9	Kadcoccilactone F	Terpenoids	12558.3	62627.3	3.19317e+07		1.08515	11.3121	+		1.09165	8.99398	+		1.08008	2.31815	+
Lmdn003699	C24H30O12	6-O-Trans-Caffeoyl Ajugol	Terpenoids	2138100	284420	13912.9		1.07796	-7.26376	-		1.07062	-4.35352	-		1.10462	-2.91023	-
Xmhn007139	C29H40O7	Kadcoccilactone E	Terpenoids	Absent	2781.53	3092400		1.08599	18.3904	+		1.09207	10.1186	+		1.10565	8.27174	+
Lmsp013116	C20H32O3	Ent-16α,17-Dihydroxykauran-2-one	Terpenoids	130957	52833	4067.4		1.08384	-5.00884	-		1.08837	-3.69926	-		1.10444	-1.30958	-
a KL, KS and KR represent leaf, stem and root of Kadsura coccinea Lem, resspectively. b Variable in importance of the projection (VIP) ≥ 1. c log2 of fold change. d - and + represent decreased and increased in abundance, respectively.
